# Supplementary material for: Disentangling the microRNA regulatory milieu in multiple myeloma: integrative genomics analysis outlines mixed miRNA-TF circuits and pathway-derived networks modulated in t(4;14) patients
Source: PubMed Central journal article supplement (PMC4823041; doi:10.18632/oncotarget.6151), 2015-10-19
Supplement: oncotarget-07-2367-s001.pdf [file oncotarget-07-2367-s001.pdf]

# Disentangling the microRNA regulatory *milieu* in multiple myeloma: integrative genomics analysis outlines mixed miRNA-TF circuits and pathway-derived networks modulated in t(4;14) patients

## Supplementary Material

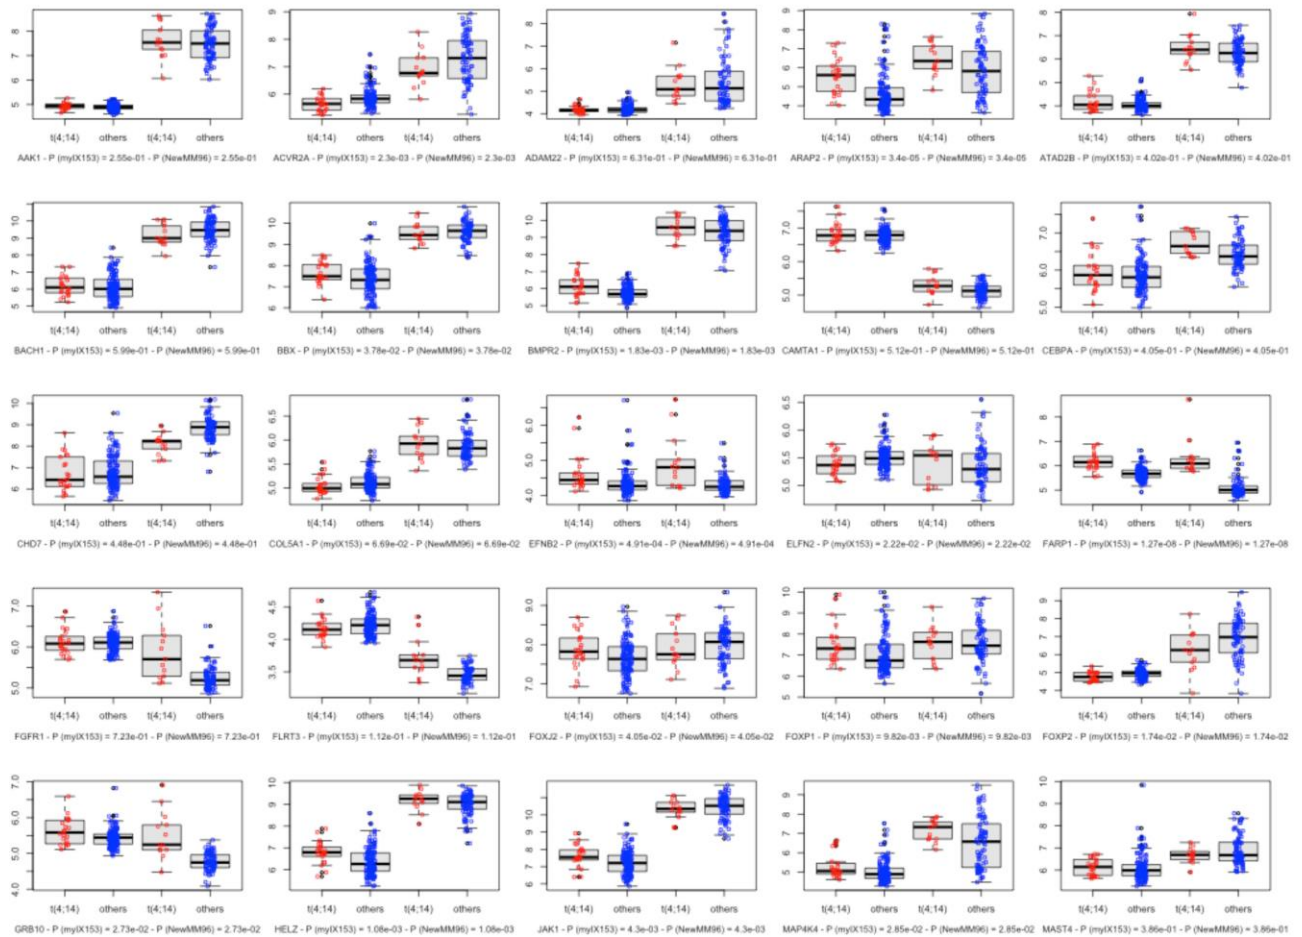

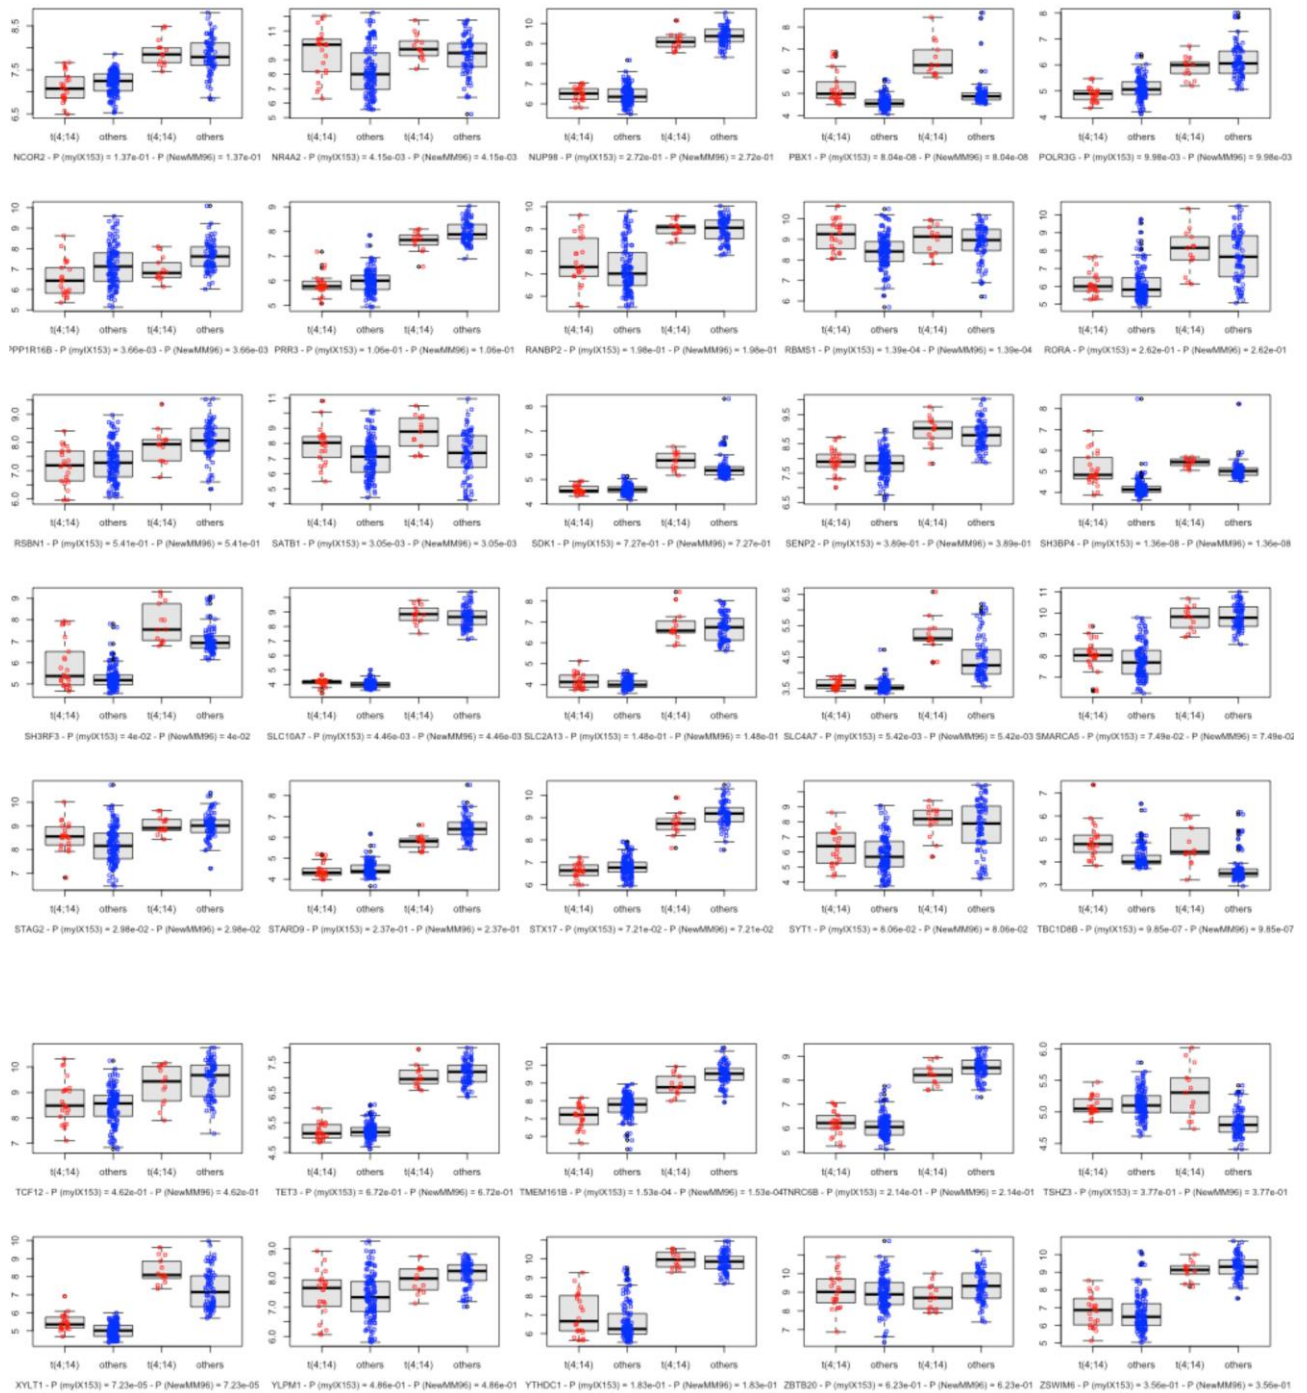

**Supplementary Figure 1.** Genes and TFs expression level in the network, measured by microarray analysis in the MyI153 and in the NewMM96 dataset respectively. Red dots in boxplot represent the t(4;14) patient expression, while blue ones represent non-t(4;14) patients expression.



(B)

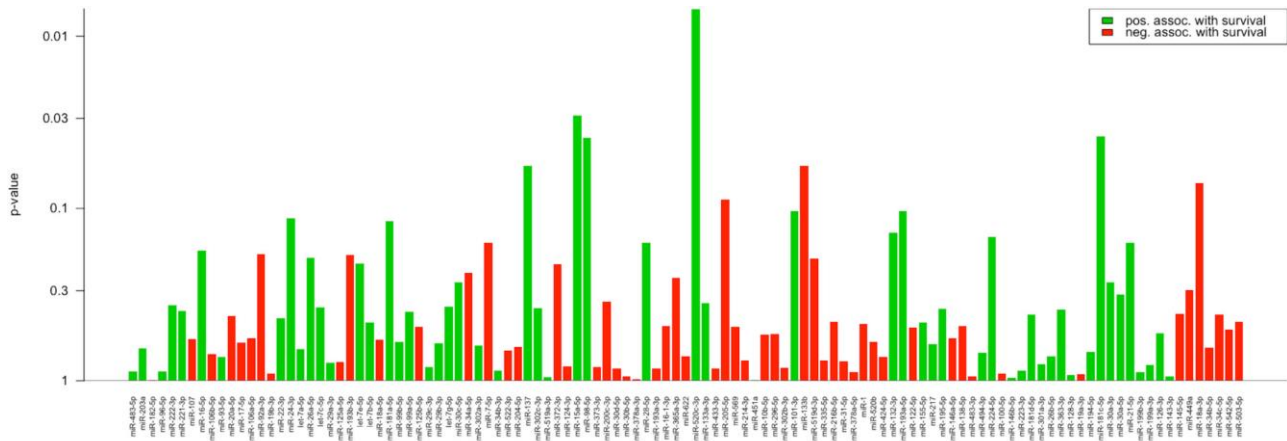

**Supplementary Figure 3. (A)** Histogram showing the levels of significance of the correlation between each miRNA transcript expression and overall survival in MyIX cases, as obtained after running *globaltest* function in R, using Cox proportional hazards and 100,000 as survival model and number of permutations, respectively. Red bars indicate that higher expression corresponded to poorer outcome. **(B)** Histogram showing the levels of significance of the correlation between each miRNA transcript expression and progression-free survival in MyIX cases, as obtained after running *globaltest* function in R, using Cox proportional hazards and 100,000 as survival model and number of permutations, respectively. Red and green bars indicate that higher or lower expression, respectively, corresponded to poorer outcome.

(A)

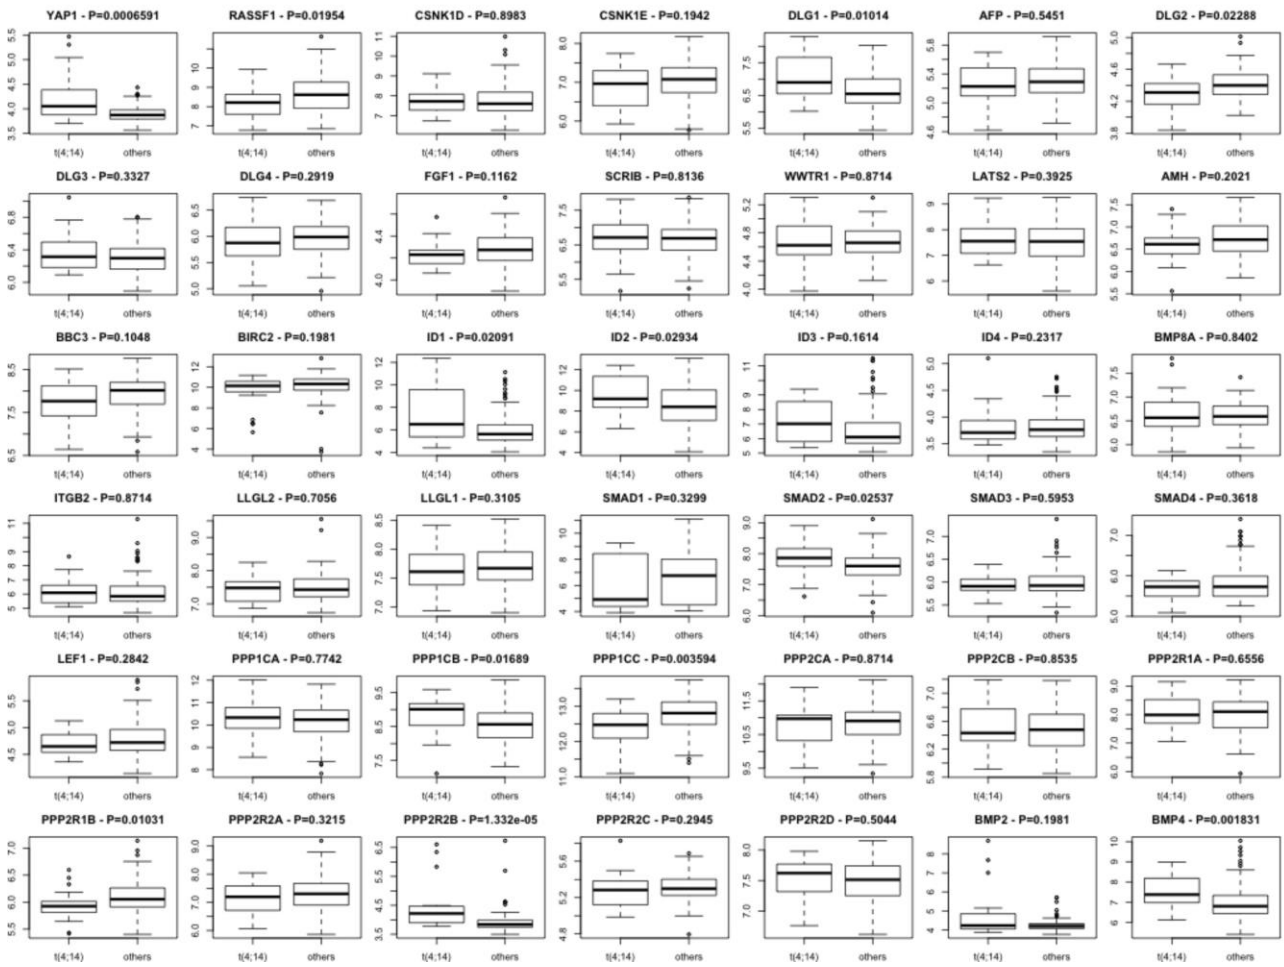



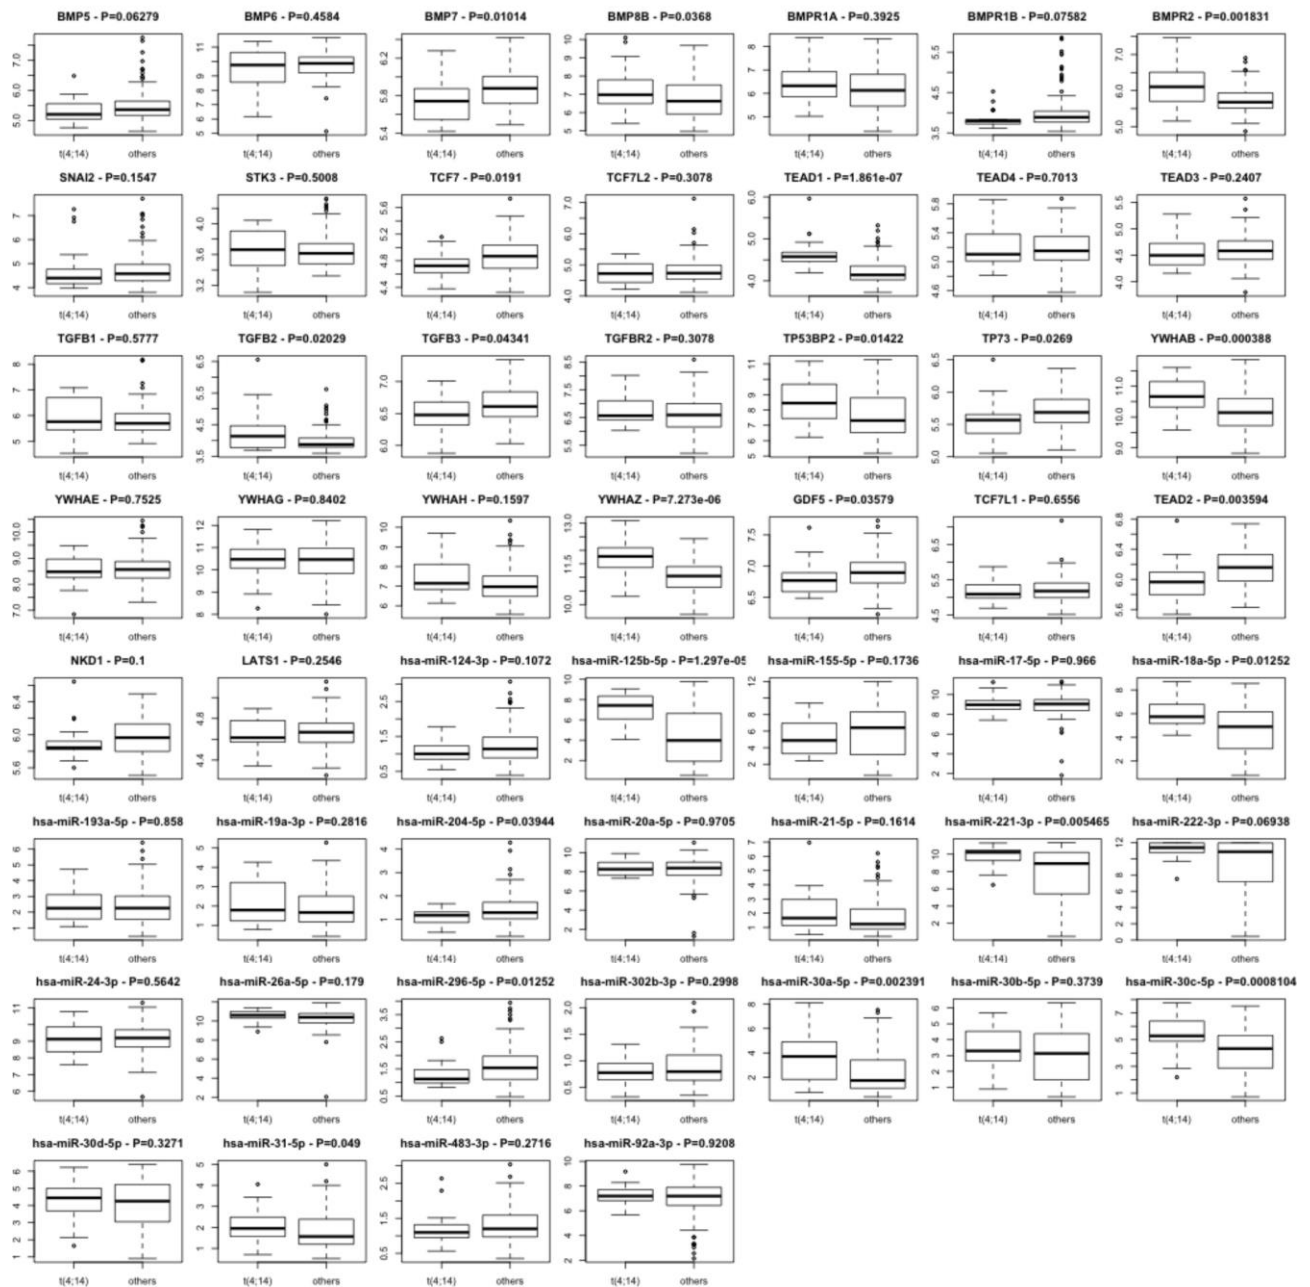

(B)

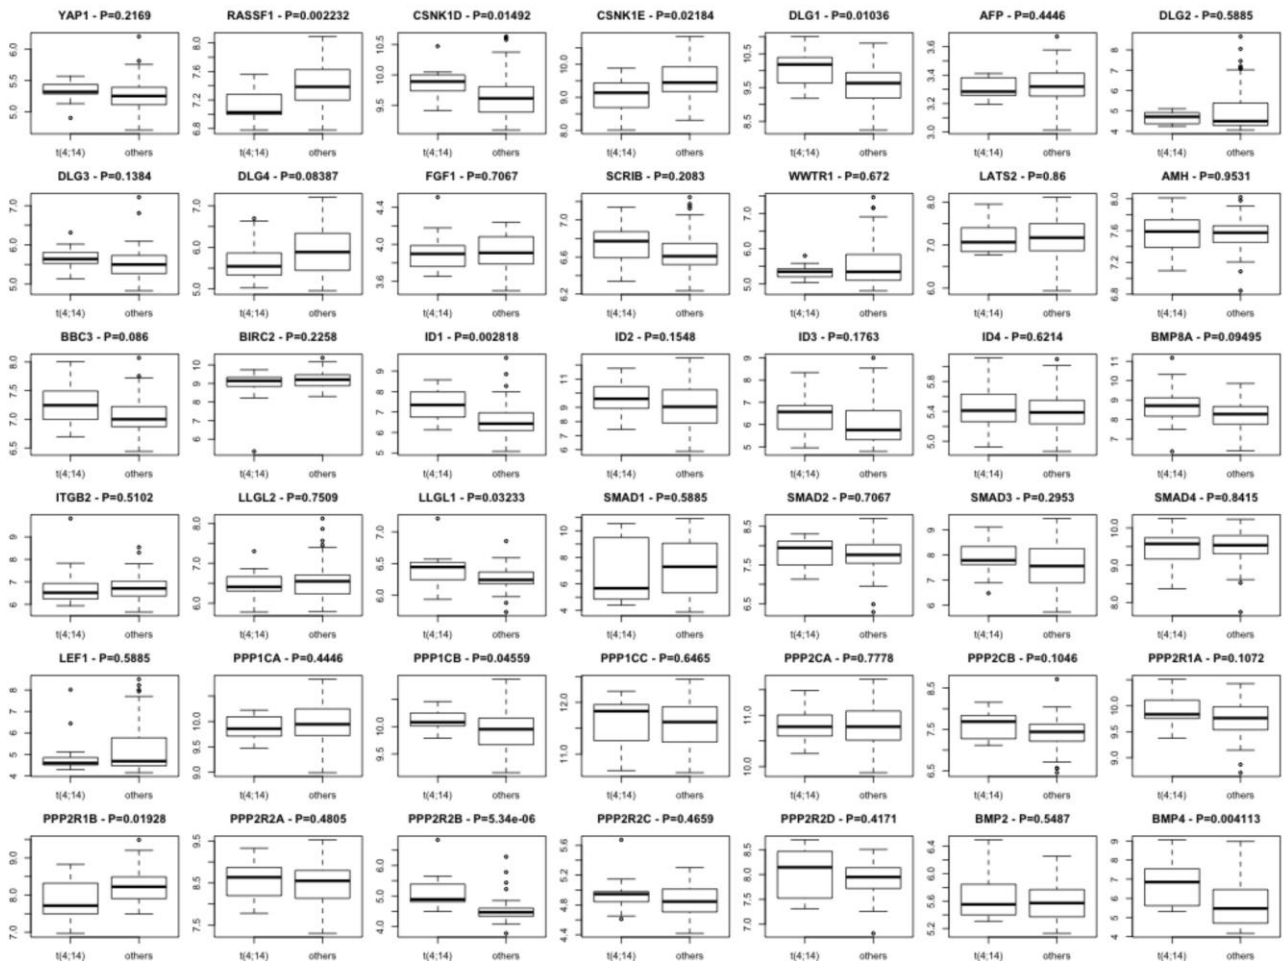

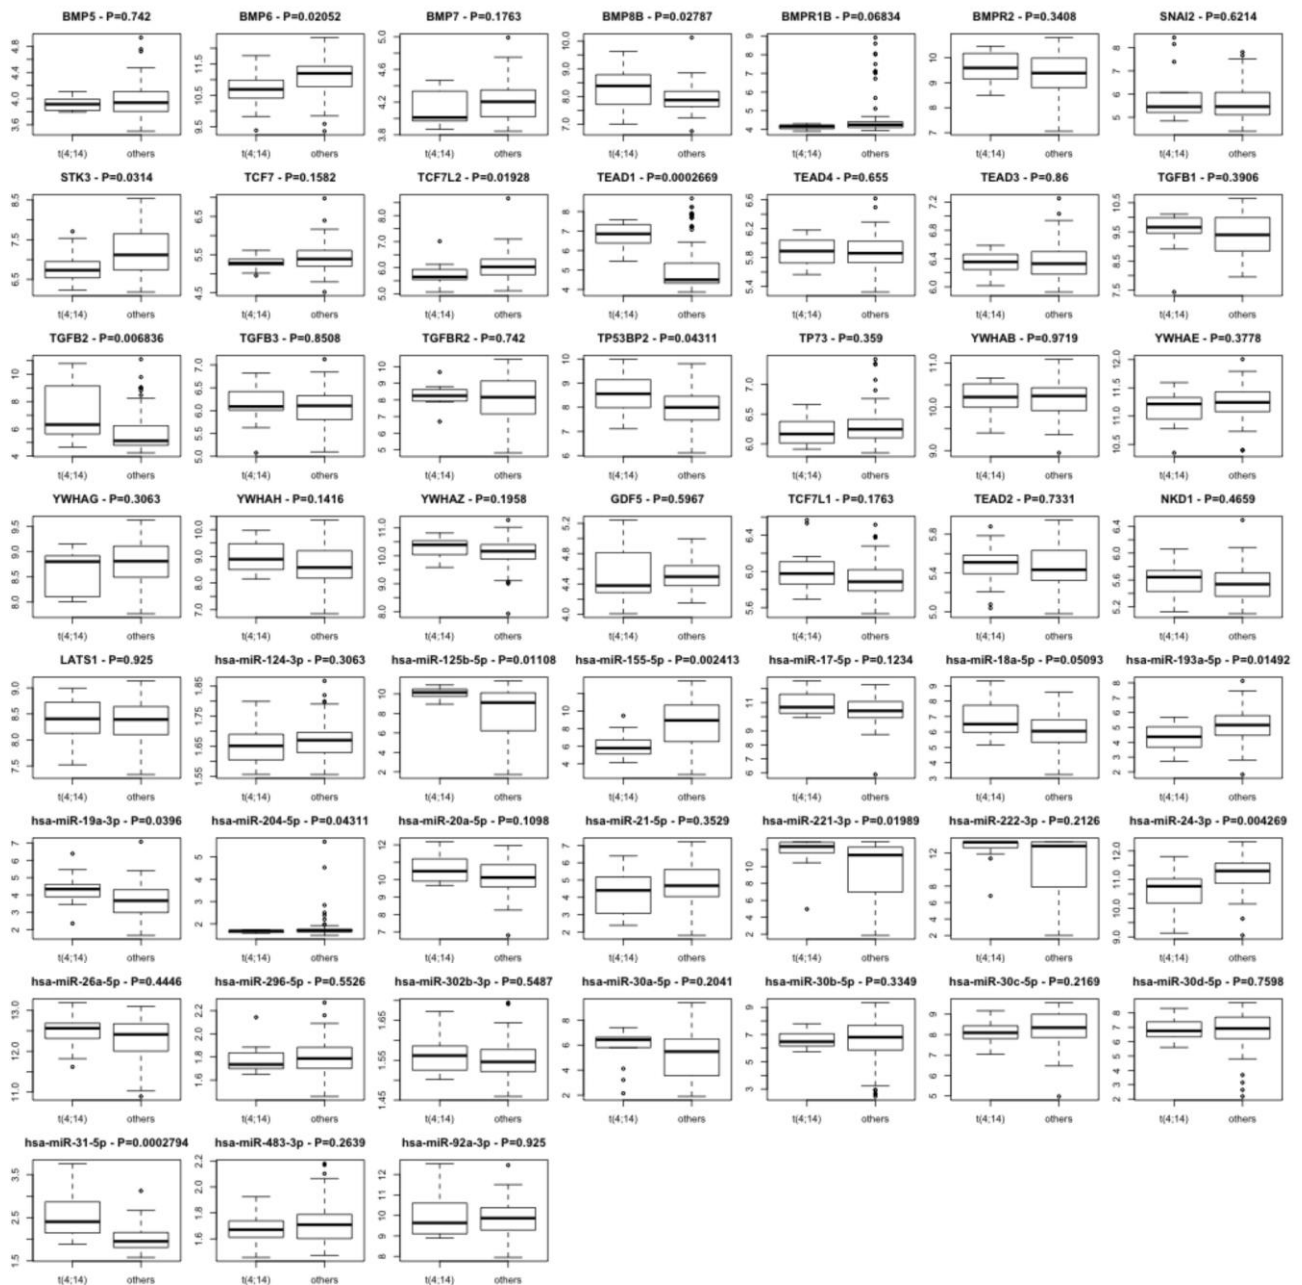

**Supplementary Figure 4. (A)** Hippo pathway members expression level in MyIX153B. **(B)** Hippo pathway members expression level in NewMM96.



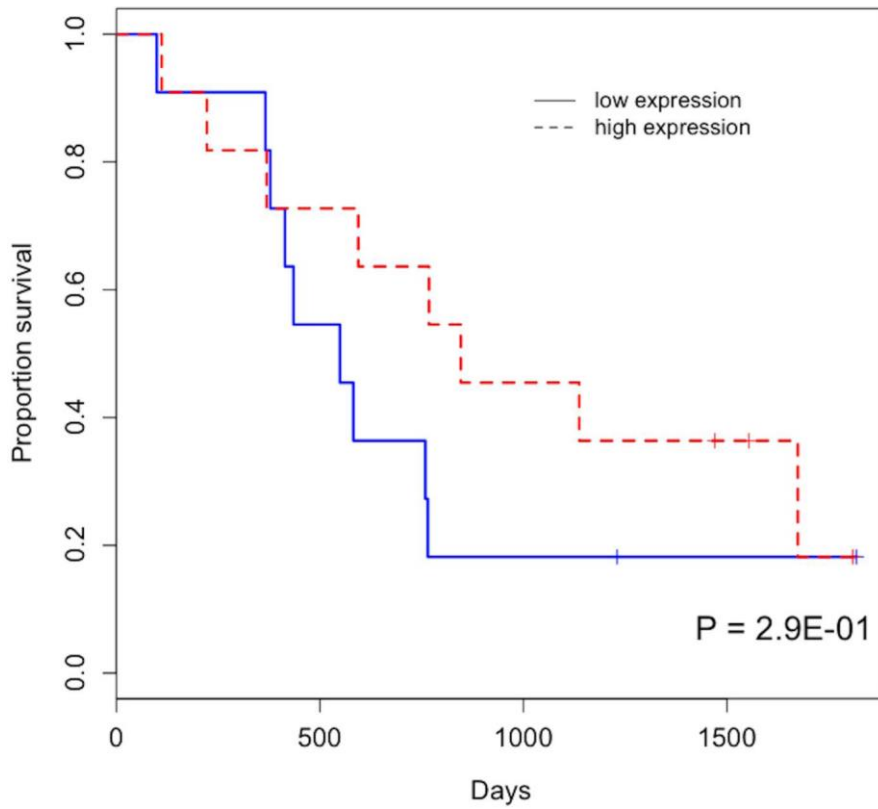

**Supplementary Figure 5.** Kaplan–Meier curves of the 2 groups defined by YAP1 expression level (on the median value).

Supplementary Table 1. Significant miRNA/TF/genes triplets identified by MAGIA2 analysis in MylX153 and NewMM96 datasets

| MylX153 |           |        |             |                 |                 |                 |                  |                  |                     |                    |  |
|---------|-----------|--------|-------------|-----------------|-----------------|-----------------|------------------|------------------|---------------------|--------------------|--|
| TF      | TF SYMBOL | mRNA   | mRNA symbol | miRNA           | TF/mRNA measure | TF/mRNA q-value | miRNA/TF measure | miRNA/TF q-value | miRNA /mRNA measure | miRNA/mRNA q-value |  |
| 5087    | PBX1      | 64131  | XYLT1       | hsa-let-7e-5p   | 0.30901227      | 0.000637425     | 0.430122884      | 9.71E-06         | 0.235589647         | 0.174286355        |  |
| 5087    | PBX1      | 344558 | SH3RF3      | hsa-let-7e-5p   | 0.243652712     | 0.009419121     | 0.430122884      | 9.71E-06         | 0.223523252         | 0.212352572        |  |
| 2308    | FOXO1     | 4216   | MAP3K4      | hsa-mir-15a-5p  | 0.415212272     | 1.42E-06        | 0.259509365      | 0.054613867      | 0.320069127         | 0.017448486        |  |
| 3659    | IRF1      | 9693   | RAPGEF2     | hsa-mir-20b-5p  | 0.596598531     | 4.20E-14        | 0.252042585      | 0.065870305      | 0.311345682         | 0.023854884        |  |
| 7528    | YY1       | 4848   | CNOT2       | hsa-mir-181c-5p | 0.537060171     | 4.22E-11        | 0.275686471      | 0.035670076      | 0.253715624         | 0.119729923        |  |
| 7528    | YY1       | 345778 | MTX3        | hsa-mir-181c-5p | 0.374468907     | 1.94E-05        | 0.275686471      | 0.035670076      | 0.22763378          | 0.068589261        |  |
| 7528    | YY1       | 7182   | NR2C2       | hsa-mir-181c-5p | 0.352393528     | 6.93E-05        | 0.275686471      | 0.035670076      | 0.201513591         | 0.305582862        |  |
| 7528    | YY1       | 157807 | CLV51       | hsa-mir-181c-5p | -0.318795579    | 0.000399167     | 0.275686471      | 0.035670076      | -0.286952133        | 0.052501097        |  |
| 6908    | TBP       | 84458  | LCOR        | hsa-mir-15a-5p  | 0.211984649     | 0.027086129     | 0.281513231      | 0.035670076      | 0.367318728         | 0.009809755        |  |
| 2308    | FOXO1     | 403    | ARL3        | hsa-mir-15a-5p  | -0.469931686    | 2.21E-08        | 0.259509365      | 0.054613867      | -0.295831697        | 0.041113627        |  |
| 3659    | IRF1      | 80055  | PGAP1       | hsa-mir-20b-5p  | 0.409151716     | 2.14E-06        | 0.252042585      | 0.065870305      | 0.293824727         | 0.044159801        |  |
| 84159   | ARID5B    | 143684 | FAM76B      | hsa-mir-32-5p   | 0.333977683     | 0.000185428     | -0.218521845     | 0.188969758      | -0.289665733        | 0.04941421         |  |
| 3659    | IRF1      | 26278  | SACS        | hsa-mir-20b-5p  | 0.351610771     | 7.21E-05        | 0.252042585      | 0.065870305      | 0.286607715         | 0.052924587        |  |
| 2308    | FOXO1     | 57700  | FAM160B1    | hsa-mir-15a-5p  | 0.544132158     | 2.00E-11        | 0.259509365      | 0.054613867      | 0.285557917         | 0.054416531        |  |
| 2308    | FOXO1     | 54861  | SNRK        | hsa-mir-15a-5p  | 0.65878332      | 5.21E-18        | 0.259509365      | 0.054613867      | 0.28224688          | 0.058641889        |  |
| 2308    | FOXO1     | 57532  | NUFIP2      | hsa-mir-15a-5p  | 0.63598338      | 1.78E-16        | 0.259509365      | 0.054613867      | 0.227407919         | 0.202027857        |  |
| 2308    | FOXO1     | 27244  | SESN1       | hsa-mir-15a-5p  | 0.539417488     | 3.28E-11        | 0.259509365      | 0.054613867      | 0.244074144         | 0.148212187        |  |
| 2308    | FOXO1     | 23405  | DICER1      | hsa-mir-15a-5p  | 0.365801269     | 3.24E-05        | 0.259509365      | 0.054613867      | 0.200806481         | 0.309989899        |  |
| 3659    | IRF1      | 51366  | UBR5        | hsa-mir-20b-5p  | 0.52903383      | 9.76E-11        | 0.252042585      | 0.065870305      | 0.255148988         | 0.116801024        |  |
| 3659    | IRF1      | 148867 | SLC30A7     | hsa-mir-20b-5p  | -0.462663032    | 3.99E-08        | 0.252042585      | 0.065870305      | -0.20287448         | 0.298459429        |  |
| 3659    | IRF1      | 23143  | LRCH1       | hsa-mir-20b-5p  | 0.410417674     | 1.96E-06        | 0.252042585      | 0.065870305      | 0.211034746         | 0.261728768        |  |
| 7023    | TFAP4     | 4130   | MAP1A       | hsa-mir-15a-5p  | 0.448127719     | 1.26E-07        | -0.236022728     | 0.103931123      | -0.230175657        | 0.191597372        |  |
| 84159   | ARID5B    | 200576 | PIKFYVE     | hsa-mir-32-5p   | 0.378779025     | 1.49E-05        | -0.218521845     | 0.188969758      | -0.246084583        | 0.143095121        |  |
| 84159   | ARID5B    | 79668  | PARP8       | hsa-mir-32-5p   | 0.374361494     | 1.95E-05        | -0.218521845     | 0.188969758      | -0.223489631        | 0.212352572        |  |
| 84159   | ARID5B    | 27031  | NPHP3       | hsa-mir-32-5p   | 0.371894825     | 2.27E-05        | -0.218521845     | 0.188969758      | -0.213719449        | 0.252169905        |  |
| 1050    | CEBPA     | 10160  | FARP1       | hsa-let-7e-5p   | 0.316657887     | 0.000441661     | 0.206170301      | 0.249488848      | 0.456558771         | 8.59E-06           |  |
| 1050    | CEBPA     | 54454  | ATAD2B      | hsa-let-7e-5p   | 0.24727436      | 0.008232341     | 0.206170301      | 0.249488848      | 0.37029516          | 0.001913337        |  |
| 2623    | GATA1     | 56134  | PCDHAC2     | hsa-mir-181c-5p | 0.581031621     | 3.02E-13        | -0.312035263     | 0.020678213      | -0.328491943        | 0.012216187        |  |
| 55810   | FOXJ2     | 5937   | RBMS1       | hsa-let-7e-5p   | 0.241806844     | 0.010053576     | 0.220774254      | 0.193092201      | 0.360620865         | 0.002232491        |  |
| 55810   | FOXJ2     | 571    | BACH1       | hsa-mir-155-5p  | 0.384163531     | 1.08E-05        | 0.268486456      | 0.071360458      | 0.321513898         | 0.016727268        |  |
| 55810   | FOXJ2     | 10622  | POLR3G      | hsa-mir-30a-5p  | -0.402148994    | 3.39E-06        | 0.221771096      | 0.193092201      | -0.319607587        | 0.017574286        |  |
| 2623    | GATA1     | 56145  | PCDH3A3     | hsa-mir-181c-5p | 0.621758935     | 1.40E-15        | -0.312035263     | 0.020678213      | -0.254025794        | 0.118708006        |  |
| 2623    | GATA1     | 3836   | KPNA1       | hsa-mir-181c-5p | -0.544861895    | 1.85E-11        | -0.312035263     | 0.020678213      | -0.211309883        | 0.261096382        |  |
| 2623    | GATA1     | 9857   | CEP350      | hsa-mir-181c-5p | -0.505082347    | 1.02E-09        | -0.312035263     | 0.020678213      | -0.248882462        | 0.134588203        |  |
| 2623    | GATA1     | 56143  | PCDH5A      | hsa-mir-181c-5p | 0.504493234     | 1.08E-09        | -0.312035263     | 0.020678213      | -0.253456583        | 0.120371517        |  |
| 2623    | GATA1     | 51441  | YTHDF2      | hsa-mir-181c-5p | -0.480524438    | 9.18E-09        | -0.312035263     | 0.020678213      | -0.245098465        | 0.145751715        |  |
| 2623    | GATA1     | 11052  | CPSF6       | hsa-mir-181c-5p | -0.469385387    | 2.30E-08        | -0.312035263     | 0.020678213      | -0.216519379        | 0.242639182        |  |
| 2623    | GATA1     | 55023  | PHIP        | hsa-mir-181c-5p | -0.466094097    | 3.01E-08        | -0.312035263     | 0.020678213      | -0.215249909        | 0.24619449         |  |
| 2623    | GATA1     | 285527 | FRYL        | hsa-mir-181c-5p | -0.445501453    | 1.54E-07        | -0.312035263     | 0.020678213      | -0.2060026          | 0.285510466        |  |
| 2623    | GATA1     | 9774   | BCLAF1      | hsa-mir-181c-5p | -0.445463465    | 1.55E-07        | -0.312035263     | 0.020678213      | -0.202826473        | 0.298459429        |  |
| 2623    | GATA1     | 26047  | CNTNAP2     | hsa-mir-181c-5p | 0.42788589      | 5.75E-07        | -0.312035263     | 0.020678213      | -0.214849956        | 0.247505212        |  |
| 2623    | GATA1     | 868    | CBLB        | hsa-mir-181c-5p | -0.416988451    | 1.26E-06        | -0.312035263     | 0.020678213      | -0.251659569        | 0.126200087        |  |
| 2623    | GATA1     | 987    | LRBA        | hsa-mir-181c-5p | -0.378734192    | 1.50E-05        | -0.312035263     | 0.020678213      | -0.217653226        | 0.239091439        |  |
| 2623    | GATA1     | 6249   | CLIP1       | hsa-mir-181c-5p | -0.37624225     | 1.74E-05        | -0.312035263     | 0.020678213      | -0.244437306        | 0.148002899        |  |
| 2623    | GATA1     | 254827 | NAALADL2    | hsa-mir-181c-5p | 0.370668574     | 2.44E-05        | -0.312035263     | 0.020678213      | -0.282774159        | 0.058451195        |  |
| 2623    | GATA1     | 1362   | CPD         | hsa-mir-181c-5p | -0.369192683    | 2.66E-05        | -0.312035263     | 0.020678213      | -0.221720823        | 0.220020913        |  |
| 2623    | GATA1     | 56135  | PCDHAC1     | hsa-mir-181c-5p | 0.359107855     | 4.78E-05        | -0.312035263     | 0.020678213      | -0.283795975        | 0.05642727         |  |
| 2623    | GATA1     | 23608  | MKRN1       | hsa-mir-181c-5p | -0.256488736    | 0.00586148      | -0.312035263     | 0.020678213      | -0.204376941        | 0.292960481        |  |
| 55810   | FOXJ2     | 92     | ACVR2A      | hsa-mir-155-5p  | 0.283141248     | 0.002021207     | 0.268486456      | 0.071360458      | 0.309097541         | 0.025805429        |  |
| 55810   | FOXJ2     | 6304   | SATB1       | hsa-mir-30a-5p  | 0.224434429     | 0.018232493     | 0.221771096      | 0.193092201      | 0.324352755         | 0.014574582        |  |
| 6927    | HNF1A     | 3207   | HOXA11      | hsa-mir-181c-5p | 0.625890912     | 7.64E-16        | -0.285655948     | 0.040387133      | -0.248419257        | 0.136473595        |  |
| 6927    | HNF1A     | 84188  | FAR1        | hsa-mir-181c-5p | -0.48106389     | 8.77E-09        | -0.285655948     | 0.040387133      | -0.215736854        | 0.245095731        |  |
| 6927    | HNF1A     | 26047  | CNTNAP2     | hsa-mir-181c-5p | 0.429095496     | 5.29E-07        | -0.285655948     | 0.040387133      | -0.214849956        | 0.247505212        |  |
| 6927    | HNF1A     | 285527 | FRYL        | hsa-mir-181c-5p | -0.41920026     | 1.08E-06        | -0.285655948     | 0.040387133      | -0.2060026          | 0.285510466        |  |
| 6927    | HNF1A     | 84458  | LCOR        | hsa-mir-181c-5p | -0.382703365    | 1.18E-05        | -0.285655948     | 0.040387133      | -0.211900004        | 0.25965577         |  |
| 6927    | HNF1A     | 987    | LRBA        | hsa-mir-181c-5p | -0.373085909    | 2.11E-05        | -0.285655948     | 0.040387133      | -0.217653226        | 0.239091439        |  |
| 6927    | HNF1A     | 5604   | MAP2K1      | hsa-mir-181c-5p | -0.332552111    | 0.00019972      | -0.285655948     | 0.040387133      | -0.233338649        | 0.180317061        |  |
| 6927    | HNF1A     | 91526  | ANKRD44     | hsa-mir-181c-5p | -0.309369939    | 0.000627979     | -0.285655948     | 0.040387133      | -0.223292933        | 0.213536572        |  |
| 6927    | HNF1A     | 284273 | ZADH2       | hsa-mir-181c-5p | -0.301224768    | 0.000911997     | -0.285655948     | 0.040387133      | -0.268674869        | 0.085040448        |  |
| 4609    | MYC       | 10018  | BCL2L11     | hsa-mir-20b-5p  | 0.374670375     | 1.92E-05        | 0.223931669      | 0.183203498      | 0.290463737         | 0.047912775        |  |
| 4609    | MYC       | 26278  | SACS        | hsa-mir-20b-5p  | 0.339473315     | 0.000139012     | 0.223931669      | 0.183203498      | 0.286607715         | 0.052924587        |  |
| 55810   | FOXJ2     | 55636  | CHD7        | hsa-mir-155-5p  | 0.479290075     | 1.01E-08        | 0.268486456      | 0.071360458      | 0.244808691         | 0.14638679         |  |
| 55810   | FOXJ2     | 57688  | ZSWIM6      | hsa-mir-155-5p  | 0.326074779     | 0.00027725      | 0.268486456      | 0.071360458      | 0.216024498         | 0.244055633        |  |
| 55810   | FOXJ2     | 6095   | RORA        | hsa-mir-155-5p  | 0.311330843     | 0.000573756     | 0.268486456      | 0.071360458      | 0.246685859         | 0.141328154        |  |
| 5966    | REL       | 7170   | TPM3        | hsa-mir-18a-5p  | 0.565769773     | 1.82E-12        | 0.216357247      | 0.205694111      | 0.273385708         | 0.073741143        |  |
| 55810   | FOXJ2     | 54665  | RSBN1       | hsa-mir-216a-5p | 0.369757039     | 2.57E-05        | -0.220708171     | 0.193092201      | -0.220456868        | 0.081023787        |  |
| 55810   | FOXJ2     | 9931   | HELZ        | hsa-let-7e-5p   | 0.424831092     | 7.17E-07        | 0.220774254      | 0.193092201      | 0.266237259         | 0.088333706        |  |
| 55810   | FOXJ2     | 9448   | MAP4K4      | hsa-let-7e-5p   | 0.370792213     | 2.42E-05        | 0.220774254      | 0.193092201      | 0.261918418         | 0.099044977        |  |
| 4609    | MYC       | 1844   | DUSP2       | hsa-mir-20b-5p  | 0.33895008      | 0.000142504     | 0.223931669      | 0.183203498      | 0.259585897         | 0.103303987        |  |
| 55810   | FOXJ2     | 23112  | TNRC6B      | hsa-mir-30a-5p  | 0.325174236     | 0.000290096     | 0.221771096      | 0.193092201      | 0.254765322         | 0.117350074        |  |
| 55810   | FOXJ2     | 8467   | SMARCA5     | hsa-mir-99a-5p  | 0.397729485     | 4.54E-06        | 0.240270446      | 0.124081481      | 0.227883715         | 0.20014152         |  |
| 4609    | MYC       | 27327  | TNRC6A      | hsa-mir-20b-5p  | 0.362129039     | 4.01E-05        | 0.223931669      | 0.183203498      | 0.243857429         | 0.148431426        |  |
| 55810   | FOXJ2     | 116984 | ARAP2       | hsa-mir-30a-5p  | 0.424095137     | 7.57E-07        | 0.221771096      | 0.193092201      | 0.23395889          | 0.178359287        |  |
| 55810   | FOXJ2     | 5903   | RANBP2      | hsa-let-7e-5p   | 0.401178382     | 3.61E-06        | 0.220774254      | 0.193092201      | 0.232680376         | 0.182598592        |  |
| 5966    | REL       | 6789   | STK4        | hsa-mir-18a-5p  | 0.371585087     | 2.31E-05        | 0.216357247      | 0.205694111      | 0.231834488         | 0.184938589        |  |
| 55810   | FOXJ2     | 3716   | JAK1        | hsa-mir-30a-5p  | 0.568964518     | 1.25E-12        | 0.221771096      | 0.193092201      | 0.212262856         | 0.258053429        |  |
| 55810   | FOXJ2     | 91746  | YTHDC1      | hsa-mir-30a-5p  | 0.503046962     | 1.22E-09        | 0.221771096      | 0.193092201      | 0.203252906         | 0.297316409        |  |
| 55810   | FOXJ2     | 56252  | YIPM1       | hsa-mir-216a-5p | 0.497888813     | 1.97E-09        | -0.220708171     | 0.193092201      | -0.215002613        | 0.247315432        |  |
| 55810   | FOXJ2     | 10735  | STAG2       | hsa-mir-30a-5p  | 0.471641921     | 1.92E-08        | 0.221771096      | 0.193092201      | 0.205069189         | 0.289744168        |  |
| 55810   | FOXJ2     | 27086  | FOXP1       | hsa-let-7e-5p   | 0.415000284     | 1.44E-06        | 0.220774254      | 0.193092201      | 0.229733857         | 0.193133624        |  |
| 55810   | FOXJ2     | 56987  | BBX         | hsa-mir-30a-5p  | 0.391356326     | 6.87E-06        | 0.221771096      | 0.193092201      | 0.215443887         | 0.245830146        |  |

  

| NewMM96 |  |  |  |  |  |  |  |  |  |  |  |
|---------|--|--|--|--|--|--|--|--|--|--|--|
|---------|--|--|--|--|--|--|--|--|--|--|--|

|       |        |        |           |                 |              |             |              |             |               |             |
|-------|--------|--------|-----------|-----------------|--------------|-------------|--------------|-------------|---------------|-------------|
| 4609  | MYC    | 5976   | UPF1      | hsa-mir-221-3p  | 0.384436368  | 0.002330279 | 0.246904038  | 0.326683913 | 0.351590306   | 0.071881911 |
| 55810 | FOXJ2  | 200424 | TET3      | hsa-mir-133b    | 0.597903312  | 8.13E-08    | 0.243342981  | 0.339228518 | 0.350076589   | 0.074643502 |
| 1050  | CEBPA  | 93986  | FOXP2     | hsa-let-7e-5p   | -0.344026364 | 0.008015639 | 0.346582897  | 0.068597635 | -0.212378274  | 0.415868472 |
| 1050  | CEBPA  | 153396 | TMEM161B  | hsa-mir-125a-5p | -0.639900247 | 3.70E-09    | 0.254471429  | 0.301126003 | -0.342894967  | 0.082760535 |
| 1050  | CEBPA  | 2260   | FGFR1     | hsa-mir-125a-5p | 0.243337203  | 0.082449854 | 0.254471429  | 0.301126003 | 0.458176138   | 0.004261106 |
| 3131  | HLF    | 360023 | ZBTB41    | hsa-mir-30d-5p  | -0.333619259 | 0.010649736 | -0.234001599 | 0.360066545 | 0.345946804   | 0.078440895 |
| 4609  | MYC    | 22895  | RPH3A     | hsa-mir-221-3p  | 0.29838223   | 0.025822686 | 0.246904038  | 0.326683913 | 0.357445916   | 0.063699446 |
| 6927  | HNF1A  | 9690   | UBE3C     | hsa-mir-30d-5p  | -0.237464786 | 0.091883768 | -0.220948968 | 0.386809501 | 0.437463578   | 0.009188772 |
| 6908  | TBP    | 9448   | MAP4K4    | hsa-mir-30a-5p  | 0.247530942  | 0.075856063 | 0.227388751  | 0.37288596  | 0.39670925    | 0.025734693 |
| 6908  | TBP    | 9444   | QKI       | hsa-mir-30a-5p  | 0.533337574  | 4.16E-06    | 0.227388751  | 0.37288596  | 0.305133399   | 0.103382066 |
| 6908  | TBP    | 57507  | ZNF608    | hsa-mir-30a-5p  | 0.304693714  | 0.022132859 | 0.227388751  | 0.37288596  | 0.342828032   | 0.082819862 |
| 1050  | CEBPA  | 2887   | GRB10     | hsa-mir-125a-5p | 0.22518908   | 0.114516674 | 0.254471429  | 0.301126003 | 0.57904415    | 0.189E-05   |
| 55810 | FOXJ2  | 6857   | SYT1      | hsa-mir-133b    | 0.367030221  | 0.004084063 | 0.243342981  | 0.339228518 | -0.323396357  | 0.116651098 |
| 6722  | SRF    | 9874   | TLK1      | hsa-mir-214-3p  | 0.592001715  | 1.21E-07    | 0.319574777  | 0.122022239 | 0.292132877   | 0.179646182 |
| 6722  | SRF    | 9697   | TRAM2     | hsa-mir-214-3p  | 0.521998134  | 7.82E-06    | 0.319574777  | 0.122022239 | 0.295312029   | 0.172215344 |
| 6722  | SRF    | 26137  | ZBTB20    | hsa-mir-214-3p  | 0.457505073  | 0.000153391 | 0.319574777  | 0.122022239 | 0.22429058    | 0.37634305  |
| 5966  | REL    | 57493  | HEG1      | hsa-mir-27a-3p  | 0.39065528   | 0.001886997 | -0.219458387 | 0.392171841 | -0.31988294   | 0.122493242 |
| 6927  | HNF1A  | 4810   | NHS       | hsa-mir-30d-5p  | 0.536414749  | 3.50E-06    | -0.220948968 | 0.386809501 | -0.314713983  | 0.132346236 |
| 55810 | FOXJ2  | 659    | BMPR2     | hsa-mir-99a-5p  | 0.628743487  | 8.88E-09    | 0.288900715  | 0.220506396 | 0.311229918   | 0.139245529 |
| 6908  | TBP    | 5335   | PLCG1     | hsa-mir-30a-5p  | 0.512976752  | 1.23E-05    | 0.227388751  | 0.37288596  | 0.305117092   | 0.151105091 |
| 5966  | REL    | 80223  | RAB11FIP1 | hsa-mir-27a-3p  | 0.283940776  | 0.036139933 | -0.219458387 | 0.392171841 | -0.320799582  | 0.120374572 |
| 6722  | SRF    | 257194 | NEGR1     | hsa-mir-150-5p  | 0.360828272  | 0.004903453 | -0.27465886  | 0.243673328 | -0.304172542  | 0.152176324 |
| 6908  | TBP    | 8658   | TNKS      | hsa-mir-30a-5p  | 0.242289735  | 0.084191339 | 0.227388751  | 0.37288596  | 0.350576795   | 0.073763164 |
| 6722  | SRF    | 23327  | NEDD4L    | hsa-mir-193b-3p | 0.36339463   | 0.004585052 | -0.27206523  | 0.245812218 | -0.297610302  | 0.165810301 |
| 3131  | HLF    | 11113  | CIT       | hsa-mir-30d-5p  | -0.239210162 | 0.088941621 | -0.234001599 | 0.360066545 | 0.341988281   | 0.084296952 |
| 1050  | CEBPA  | 221935 | SDK1      | hsa-let-7e-5p   | 0.20548181   | 0.158914195 | 0.346582897  | 0.068597635 | 0.329792404   | 0.104662547 |
| 4609  | MYC    | 80205  | CHD9      | hsa-mir-22-3p   | -0.333275216 | 0.010756488 | -0.263648296 | 0.275511935 | 0.296627558   | 0.168109278 |
| 4609  | MYC    | 10527  | IPO7      | hsa-mir-22-3p   | 0.430572797  | 0.000456313 | -0.263648296 | 0.275511935 | -0.290714056  | 0.183617684 |
| 4779  | NFE2L1 | 6547   | SLC8A3    | hsa-mir-21-5p   | -0.202627123 | 0.165796564 | 0.203434083  | 0.456849188 | -0.401406897  | 0.024547948 |
| 1958  | EGR1   | 80205  | CHD9      | hsa-mir-92b-3p  | 0.219116562  | 0.12724628  | -0.266469266 | 0.262866647 | -0.2564611656 | 0.067283672 |
| 55810 | FOXJ2  | 84068  | SLC10A7   | hsa-mir-204-5p  | 0.585227087  | 1.88E-07    | -0.263236318 | 0.275511935 | -0.285520093  | 0.194674023 |
| 5966  | REL    | 2113   | ETS1      | hsa-mir-193a-3p | 0.246099229  | 0.078042957 | 0.304778617  | 0.164315296 | 0.322622906   | 0.1175815   |
| 6927  | HNF1A  | 219623 | TMEM26    | hsa-mir-30d-5p  | 0.574809702  | 3.65E-07    | -0.220948968 | 0.386809501 | -0.28491861   | 0.196643764 |
| 6886  | TAL1   | 10735  | STAG2     | hsa-mir-363-3p  | -0.230310655 | 0.104548054 | -0.326061697 | 0.101500172 | 0.211594118   | 0.418471902 |
| 55810 | FOXJ2  | 27086  | FOXP1     | hsa-mir-449b-5p | 0.427582024  | 0.000512301 | -0.257551747 | 0.293235229 | -0.278182934  | 0.214524324 |
| 5966  | REL    | 6925   | TCF4      | hsa-mir-193a-3p | -0.229425975 | 0.106228171 | 0.304778617  | 0.164315296 | -0.326000646  | 0.111368891 |
| 55810 | FOXJ2  | 4929   | NR4A2     | hsa-mir-449b-5p | 0.31541115   | 0.017059098 | -0.257551747 | 0.293235229 | -0.282914711  | 0.201153906 |
| 55810 | FOXJ2  | 9612   | NCOR2     | hsa-mir-449b-5p | 0.64249249   | 2.97E-09    | -0.257551747 | 0.293235229 | -0.276615151  | 0.218261219 |
| 6927  | HNF1A  | 51804  | SIX4      | hsa-mir-30d-5p  | 0.342893859  | 0.008259446 | -0.220948968 | 0.386809501 | -0.275806015  | 0.221149748 |
| 55810 | FOXJ2  | 114134 | SLC2A13   | hsa-mir-449b-5p | 0.408196229  | 0.001039602 | -0.257551747 | 0.293235229 | -0.270109284  | 0.237192474 |
| 55810 | FOXJ2  | 375449 | MAST4     | hsa-mir-214-3p  | 0.372412765  | 0.003457634 | 0.214427938  | 0.405220009 | 0.270628211   | 0.235380109 |
| 6722  | SRF    | 57534  | MIB1      | hsa-mir-150-5p  | -0.493648744 | 3.14E-05    | -0.27465886  | 0.243673328 | 0.264457269   | 0.253631178 |
| 6777  | STAT5B | 50650  | ARHGFE3   | hsa-mir-17-5p   | 0.356709566  | 0.005537673 | 0.20840242   | 0.4329936   | -0.268444357  | 0.241799575 |
| 6722  | SRF    | 51773  | RSF1      | hsa-mir-193b-3p | -0.383764889 | 0.002379255 | -0.27206523  | 0.245812218 | -0.248667113  | 0.299754271 |
| 6722  | SRF    | 10409  | BASP1     | hsa-mir-150-5p  | 0.343180403  | 0.00819254  | -0.27465886  | 0.243673328 | -0.206487276  | 0.436388366 |
| 6722  | SRF    | 7003   | TEAD1     | hsa-mir-150-5p  | 0.341054488  | 0.008070235 | -0.27465886  | 0.243673328 | -0.220632654  | 0.387302055 |
| 5966  | REL    | 57493  | HEG1      | hsa-mir-17-5p   | 0.39065528   | 0.001886997 | 0.269862665  | 0.250836654 | 0.210536015   | 0.422391715 |
| 6722  | SRF    | 5578   | PRKCA     | hsa-mir-150-5p  | 0.300764227  | 0.024416383 | -0.27465886  | 0.243673328 | -0.203515305  | 0.446484364 |
| 6927  | HNF1A  | 57724  | EPG5      | hsa-mir-30d-5p  | -0.208880795 | 0.158088914 | -0.220948968 | 0.386809501 | 0.319747537   | 0.122691415 |
| 55810 | FOXJ2  | 22848  | AAK1      | hsa-mir-204-5p  | 0.474778989  | 7.38E-05    | -0.263236318 | 0.275511935 | -0.216173564  | 0.402627662 |
| 1958  | EGR1   | 659    | BMPR2     | hsa-mir-92b-3p  | 0.324495137  | 0.013590067 | -0.266469266 | 0.262866647 | -0.223140193  | 0.380609759 |
| 55810 | FOXJ2  | 59343  | SNP2      | hsa-mir-214-3p  | -0.58833297  | 1.53E-07    | 0.214427938  | 0.405220009 | 0.253610515   | 0.284924838 |
| 55810 | FOXJ2  | 200424 | TET3      | hsa-mir-214-3p  | 0.597903312  | 8.13E-08    | 0.214427938  | 0.405220009 | 0.253402125   | 0.285209987 |
| 3131  | HLF    | 2104   | ESRRG     | hsa-mir-30d-5p  | 0.207609613  | 0.153739459 | -0.234001599 | 0.360066545 | -0.313511746  | 0.134009507 |
| 55810 | FOXJ2  | 6938   | TCF12     | hsa-mir-449b-5p | 0.632619514  | 6.58E-09    | -0.257551747 | 0.293235229 | -0.219982469  | 0.389229344 |
| 5966  | REL    | 57493  | HEG1      | hsa-mir-19a-3p  | 0.39065528   | 0.001886997 | 0.223461304  | 0.381194072 | 0.251274877   | 0.291865123 |
| 55810 | FOXJ2  | 53616  | ADAM22    | hsa-mir-449b-5p | -0.338085269 | 0.009436203 | -0.257551747 | 0.293235229 | 0.242600076   | 0.318275935 |
| 1050  | CEBPA  | 23677  | SH3BP4    | hsa-mir-125a-5p | 0.319492301  | 0.015407101 | 0.254471429  | 0.301126003 | 0.22472741    | 0.374432085 |
| 6908  | TBP    | 23314  | SATB2     | hsa-mir-30a-5p  | 0.332990356  | 0.010831044 | 0.227388751  | 0.37288596  | 0.229852714   | 0.358594197 |
| 55810 | FOXJ2  | 26137  | ZBTB20    | hsa-mir-214-3p  | 0.430520762  | 0.000456406 | 0.214427938  | 0.405220009 | 0.22429058    | 0.37634305  |
| 6927  | HNF1A  | 81706  | PPP1R14C  | hsa-mir-30d-5p  | 0.573214496  | 4.03E-07    | -0.220948968 | 0.386809501 | -0.221784879  | 0.384125725 |
| 6908  | TBP    | 114882 | OSBPL8    | hsa-mir-30a-5p  | 0.308107276  | 0.020418287 | 0.227388751  | 0.37288596  | 0.226458075   | 0.369009666 |
| 5966  | REL    | 3021   | H3F3B     | hsa-mir-27a-3p  | 0.526320952  | 6.19E-06    | -0.219458387 | 0.392171841 | -0.25085688   | 0.455273337 |
| 1050  | CEBPA  | 1289   | COL5A1    | hsa-mir-192-5p  | 0.712297721  | 4.07E-12    | -0.208035838 | 0.4329936   | -0.204320716  | 0.443033137 |
| 55810 | FOXJ2  | 23261  | CAMTA1    | hsa-mir-100-5p  | 0.305775301  | 0.021564352 | 0.203032549  | 0.458205671 | 0.21095776    | 0.42066609  |
| 3659  | IRF1   | 11113  | CIT       | hsa-mir-130b-3p | -0.515852184 | 1.07E-05    | -0.413125718 | 0.006737956 | 0.289251809   | 0.185760362 |
| 3659  | IRF1   | 22990  | PCNX      | hsa-mir-130b-3p | 0.491925146  | 3.40E-05    | -0.413125718 | 0.006737956 | -0.28029669   | 0.208230843 |
| 5087  | PBX1   | 344558 | SH3RF3    | hsa-let-7e-5p   | 0.478935546  | 6.19E-05    | 0.419509568  | 0.006737956 | 0.261890293   | 0.262356366 |
| 5087  | PBX1   | 64131  | XYLT1     | hsa-let-7e-5p   | 0.42189404   | 0.000633711 | 0.419509568  | 0.006737956 | 0.261378096   | 0.263271123 |
| 3659  | IRF1   | 3782   | KCNN3     | hsa-mir-130b-3p | -0.402974758 | 0.001248697 | -0.413125718 | 0.006737956 | 0.298572635   | 0.163163284 |
| 5087  | PBX1   | 57519  | STARD9    | hsa-let-7e-5p   | -0.28481417  | 0.035415882 | 0.419509568  | 0.006737956 | -0.478740315  | 0.002231699 |
| 3659  | IRF1   | 9575   | CLOCK     | hsa-mir-130b-3p | -0.351040729 | 0.006565523 | -0.413125718 | 0.006737956 | 0.251010804   | 0.291865123 |
| 3659  | IRF1   | 11177  | BAZ1A     | hsa-mir-130b-3p | 0.32463226   | 0.013546266 | -0.413125718 | 0.006737956 | -0.209905337  | 0.424179688 |
| 3659  | IRF1   | 57614  | KIAA1468  | hsa-mir-130b-3p | -0.313399338 | 0.017895432 | -0.413125718 | 0.006737956 | 0.230601634   | 0.356068764 |
| 5087  | PBX1   | 221935 | SDK1      | hsa-let-7e-5p   | 0.308693518  | 0.020121177 | 0.419509568  | 0.006737956 | 0.329792404   | 0.104662547 |
| 6722  | SRF    | 2060   | EPS15     | hsa-mir-181b-5p | -0.299107977 | 0.025400917 | 0.219208487  | 0.573477739 | -0.364472788  | 0.003615759 |
| 3659  | IRF1   | 94134  | ARHGAP12  | hsa-mir-130b-3p | -0.297620141 | 0.026264295 | -0.413125718 | 0.006737956 | 0.464803589   | 0.077498769 |
| 3659  | IRF1   | 4302   | MLLT2     | hsa-mir-130b-3p | 0.293102579  | 0.029239627 | -0.413125718 | 0.006737956 | -0.319583734  | 0.122691415 |
| 3659  | IRF1   | 9839   | ZEB2      | hsa-mir-130b-3p | 0.291825603  | 0.030193834 | -0.413125718 | 0.006737956 | -0.209597436  | 0.424694747 |
| 3659  | IRF1   | 6916   | TBXAS1    | hsa-mir-130b-3p | 0.288732838  | 0.032531974 | -0.413125718 | 0.006737956 | -0.275598133  | 0.221868048 |
| 3659  | IRF1   | 9917   | FAM20B    | hsa-mir-130b-3p | -0.284911277 | 0.03535492  | -0.413125718 | 0.006737956 | 0.268888286   | 0.240940924 |
| 3131  | HLF    | 116931 | MED12L    | hsa-mir-148b-3p | 0.388137032  | 0.002057149 | -0.295017472 | 0.18692269  | -0.372256635  | 0.048613643 |
| 3659  | IRF1   | 79932  |           |                 |              |             |              |             |               |             |

|       |       |        |          |                 |              |             |              |             |              |             |
|-------|-------|--------|----------|-----------------|--------------|-------------|--------------|-------------|--------------|-------------|
| 3659  | IRF1  | 6059   | ABCE1    | hsa-mir-130b-3p | -0.225454813 | 0.114130536 | -0.413125718 | 0.006737956 | 0.263382328  | 0.257669989 |
| 6722  | SRF   | 7049   | TGFBF3   | hsa-mir-181b-5p | -0.235839738 | 0.094579058 | 0.219208487  | 0.573477739 | -0.393027226 | 0.031022509 |
| 7026  | NR2F2 | 5594   | MAPK1    | hsa-mir-194-5p  | -0.498089222 | 2.55E-05    | -0.21897886  | 0.573477739 | 0.315068692  | 0.131794602 |
| 3659  | IRF1  | 4774   | NFIA     | hsa-mir-130b-3p | 0.218384993  | 0.128877847 | -0.413125718 | 0.006737956 | -0.258888181 | 0.27046487  |
| 3659  | IRF1  | 80854  | SETD7    | hsa-mir-130b-3p | -0.217873096 | 0.129848524 | -0.413125718 | 0.006737956 | 0.282811704  | 0.201288037 |
| 3131  | HLF   | 6095   | RORA     | hsa-mir-148b-3p | 0.361892981  | 0.004773709 | -0.295017472 | 0.18692269  | -0.314808905 | 0.132159875 |
| 5087  | PBX1  | 93986  | FOX2     | hsa-let-7e-5p   | -0.215574455 | 0.135031042 | 0.419509568  | 0.006737956 | -0.212378274 | 0.415868472 |
| 3659  | IRF1  | 11069  | RAPGEF4  | hsa-mir-130b-3p | 0.212036284  | 0.143185494 | -0.413125718 | 0.006737956 | -0.225983426 | 0.370344769 |
| 5087  | PBX1  | 55014  | STX17    | hsa-let-7e-5p   | -0.210545827 | 0.146781658 | 0.419509568  | 0.006737956 | -0.229803709 | 0.358607459 |
| 3659  | IRF1  | 3479   | IGF1     | hsa-mir-130b-3p | 0.207819001  | 0.153277523 | -0.413125718 | 0.006737956 | -0.220767668 | 0.431997867 |
| 3131  | HLF   | 11113  | CIT      | hsa-mir-30d-5p  | -0.239210162 | 0.088941621 | -0.234001599 | 0.500789619 | 0.341988281  | 0.084296952 |
| 6722  | SRF   | 9908   | G3BP2    | hsa-mir-181b-5p | -0.555189861 | 1.25E-06    | 0.219208487  | 0.573477739 | -0.293377357 | 0.177354732 |
| 6722  | SRF   | 22884  | WDR37    | hsa-mir-181b-5p | -0.313454221 | 0.017878734 | 0.219208487  | 0.573477739 | -0.298896034 | 0.162757307 |
| 1050  | CEBPA | 80742  | PRR3     | hsa-mir-101-3p  | -0.522862324 | 7.47E-06    | -0.295848959 | 0.18692269  | 0.212758327  | 0.414430956 |
| 1050  | CEBPA | 1948   | EFNB2    | hsa-mir-101-3p  | 0.454829693  | 0.00017182  | -0.295848959 | 0.18692269  | -0.241713914 | 0.321417831 |
| 1050  | CEBPA | 57616  | TSHZ3    | hsa-mir-101-3p  | 0.433069226  | 0.000415438 | -0.295848959 | 0.18692269  | -0.278630581 | 0.213564378 |
| 1050  | CEBPA | 114794 | ELFN2    | hsa-mir-101-3p  | 0.332759357  | 0.010880308 | -0.295848959 | 0.18692269  | -0.217964645 | 0.396116772 |
| 3659  | IRF1  | 57678  | GPAM     | hsa-mir-183-5p  | -0.58964358  | 1.40E-07    | -0.212218405 | 0.573861965 | 0.28326411   | 0.19978114  |
| 6722  | SRF   | 26750  | RPS6KC1  | hsa-mir-22-3p   | -0.458920005 | 0.000143977 | -0.280711927 | 0.214848181 | 0.278960938  | 0.212326959 |
| 6722  | SRF   | 149420 | PD1K1L   | hsa-mir-22-3p   | -0.62923334  | 8.82E-09    | -0.280711927 | 0.214848181 | 0.221108958  | 0.385763051 |
| 6722  | SRF   | 26127  | FGFR10P2 | hsa-mir-22-3p   | -0.507383441 | 1.63E-05    | -0.280711927 | 0.214848181 | 0.201658263  | 0.452405133 |
| 55810 | FOXJ2 | 27086  | FOX2     | hsa-mir-449b-5p | 0.427582024  | 0.000512301 | -0.257551747 | 0.364777946 | -0.278182934 | 0.214524324 |
| 6722  | SRF   | 9880   | ZBTB39   | hsa-mir-22-3p   | 0.449363628  | 0.000214724 | -0.280711927 | 0.214848181 | -0.244857249 | 0.312082992 |
| 6722  | SRF   | 152485 | ZNF827   | hsa-mir-22-3p   | 0.443996939  | 0.000270316 | -0.280711927 | 0.214848181 | -0.249618878 | 0.295971114 |
| 55810 | FOXJ2 | 4929   | NR4A2    | hsa-mir-449b-5p | 0.3154115    | 0.017059098 | -0.257551747 | 0.364777946 | -0.282914711 | 0.201153906 |
| 55810 | FOXJ2 | 9612   | NCOR2    | hsa-mir-449b-5p | 0.64249249   | 2.97E-09    | -0.257551747 | 0.364777946 | -0.276615151 | 0.218261219 |
| 6722  | SRF   | 26052  | DNM3     | hsa-mir-22-3p   | 0.36231774   | 0.004720651 | -0.280711927 | 0.214848181 | -0.201600669 | 0.452405133 |
| 55810 | FOXJ2 | 114134 | SLC2A13  | hsa-mir-449b-5p | 0.408196229  | 0.001039602 | -0.257551747 | 0.364777946 | -0.270109284 | 0.237192474 |
| 1958  | EGR1  | 57620  | STIM2    | hsa-mir-181b-5p | -0.200220302 | 0.171913962 | 0.224799986  | 0.573477739 | -0.345329886 | 0.079315208 |
| 3131  | HLF   | 2104   | ESRRG    | hsa-mir-30d-5p  | 0.207609613  | 0.153739459 | -0.234001599 | 0.500789619 | -0.313511746 | 0.134009507 |
| 3131  | HLF   | 2104   | ESRRG    | hsa-mir-148b-3p | 0.207609613  | 0.153739459 | -0.295017472 | 0.18692269  | -0.303985551 | 0.152264627 |
| 55810 | FOXJ2 | 53616  | ADAM22   | hsa-mir-449b-5p | -0.338085269 | 0.009436203 | -0.257551747 | 0.364777946 | 0.242600076  | 0.318275935 |
| 55810 | FOXJ2 | 6938   | TCF12    | hsa-mir-449b-5p | 0.632619514  | 6.58E-09    | -0.257551747 | 0.364777946 | -0.219982469 | 0.389229344 |
| 3659  | IRF1  | 8502   | PKP4     | hsa-mir-183-5p  | -0.356884672 | 0.005510432 | -0.212218405 | 0.573861965 | 0.226729527  | 0.368183936 |
| 6722  | SRF   | 23253  | ANKRD12  | hsa-mir-181b-5p | 0.371378762  | 0.003560796 | 0.219208487  | 0.573477739 | -0.211198349 | 0.419930268 |
| 6722  | SRF   | 4299   | AFF1     | hsa-mir-181b-5p | 0.498323     | 2.53E-05    | 0.219208487  | 0.573477739 | -0.206586093 | 0.435887141 |
| 6722  | SRF   | 56147  | PCDHA1   | hsa-mir-181b-5p | 0.318148449  | 0.015923734 | 0.219208487  | 0.573477739 | 0.208327391  | 0.429969251 |
| 1958  | EGR1  | 5813   | PURA     | hsa-mir-506-3p  | 0.545608549  | 2.16E-06    | -0.206234775 | 0.573861965 | -0.20363594  | 0.446186755 |
| 6722  | SRF   | 257194 | NEGR1    | hsa-mir-181b-5p | 0.360828272  | 0.004903453 | 0.219208487  | 0.573477739 | 0.200984129  | 0.454697296 |

**Supplementary Table 2. (A) 66 and (B) 47 most significantly modulated pathways identified at  $P < 0.1$ , according to Micrographite analysis of NewMM96 and MylX153 dataset, respectively. The 17 common pathways are underlined.**

**A.**

|                                                 | p-value mean | q-value mean | p-value variance | q-value variance |
|-------------------------------------------------|--------------|--------------|------------------|------------------|
| Acute myeloid leukemia                          | < 0.01       | < 0.01       | < 0.01           | < 0.01           |
| Amoebiasis                                      | < 0.01       | < 0.01       | < 0.01           | < 0.01           |
| <u>Amphetamine addiction</u>                    | < 0.01       | < 0.01       | < 0.01           | < 0.01           |
| Apoptosis                                       | < 0.01       | < 0.01       | < 0.01           | < 0.01           |
| <u>Basal cell carcinoma</u>                     | < 0.01       | < 0.01       | < 0.01           | < 0.01           |
| Bladder cancer                                  | < 0.01       | < 0.01       | < 0.01           | < 0.01           |
| Calcium signaling pathway                       | < 0.01       | < 0.01       | < 0.01           | < 0.01           |
| Cholinergic synapse                             | < 0.01       | < 0.01       | < 0.01           | < 0.01           |
| <u>Circadian entrainment</u>                    | < 0.01       | < 0.01       | < 0.01           | < 0.01           |
| Cytosolic DNA-sensing pathway                   | 0.01         | 0.013898305  | < 0.01           | < 0.01           |
| Dilated cardiomyopathy                          | < 0.01       | < 0.01       | < 0.01           | < 0.01           |
| Dopaminergic synapse                            | < 0.01       | < 0.01       | < 0.01           | < 0.01           |
| Dorso-ventral axis formation                    | < 0.01       | < 0.01       | < 0.01           | < 0.01           |
| Endometrial cancer                              | < 0.01       | < 0.01       | < 0.01           | < 0.01           |
| Epstein-Barr virus infection                    | < 0.01       | < 0.01       | < 0.01           | < 0.01           |
| ErbB signaling pathway                          | < 0.01       | < 0.01       | < 0.01           | < 0.01           |
| Fc gamma R-mediated phagocytosis                | < 0.01       | < 0.01       | < 0.01           | < 0.01           |
| Fructose and mannose metabolism                 | < 0.01       | < 0.01       | < 0.01           | < 0.01           |
| Gap junction                                    | < 0.01       | < 0.01       | < 0.01           | < 0.01           |
| Glioma                                          | < 0.01       | < 0.01       | < 0.01           | < 0.01           |
| Long-term depression                            | < 0.01       | < 0.01       | < 0.01           | < 0.01           |
| <u>Morphine addiction</u>                       | < 0.01       | < 0.01       | < 0.01           | < 0.01           |
| Pancreatic secretion                            | < 0.01       | < 0.01       | < 0.01           | < 0.01           |
| Primary bile acid biosynthesis                  | < 0.01       | < 0.01       | < 0.01           | < 0.01           |
| <u>Progesterone-mediated oocyte maturation</u>  | < 0.01       | < 0.01       | < 0.01           | < 0.01           |
| Rheumatoid arthritis                            | < 0.01       | < 0.01       | < 0.01           | < 0.01           |
| Selenocompound metabolism                       | 0.01         | 0.013898305  | < 0.01           | < 0.01           |
| Thyroid cancer                                  | < 0.01       | < 0.01       | < 0.01           | < 0.01           |
| Transcriptional misregulation in cancer         | < 0.01       | < 0.01       | < 0.01           | < 0.01           |
| <u>Type II diabetes mellitus</u>                | < 0.01       | < 0.01       | < 0.01           | < 0.01           |
| <u>Viral myocarditis</u>                        | < 0.01       | < 0.01       | < 0.01           | < 0.01           |
| Bacterial invasion of epithelial cells          | < 0.01       | < 0.01       | 0.01             | 0.041            |
| Colorectal cancer                               | < 0.01       | < 0.01       | 0.01             | 0.041            |
| <u>Fatty acid biosynthesis</u>                  | 0.02         | 0.026666667  | 0.01             | 0.041            |
| <u>Glutamatergic synapse</u>                    | < 0.01       | < 0.01       | 0.01             | 0.041            |
| Long-term potentiation                          | < 0.01       | < 0.01       | 0.01             | 0.041            |
| <u>Sphingolipid metabolism</u>                  | < 0.01       | < 0.01       | 0.01             | 0.041            |
| <u>Vasopressin-regulated water reabsorption</u> | < 0.01       | < 0.01       | 0.01             | 0.041            |
| Vibrio cholerae infection                       | < 0.01       | < 0.01       | 0.01             | 0.041            |
| Amino sugar and nucleotide sugar metabolism     | < 0.01       | < 0.01       | 0.02             | 0.0656           |
| B cell receptor signaling pathway               | < 0.01       | < 0.01       | 0.02             | 0.0656           |

|                                                                   |        |             |      |             |
|-------------------------------------------------------------------|--------|-------------|------|-------------|
| <u>Chagas disease (American trypanosomiasis)</u>                  | < 0.01 | < 0.01      | 0.02 | 0.0656      |
| <u>ECM-receptor interaction</u>                                   | < 0.01 | < 0.01      | 0.02 | 0.0656      |
| <u>Epithelial cell signaling in Helicobacter pylori infection</u> | < 0.01 | < 0.01      | 0.02 | 0.0656      |
| <u>Inositol phosphate metabolism</u>                              | < 0.01 | < 0.01      | 0.02 | 0.0656      |
| <u>Mucin type O-Glycan biosynthesis</u>                           | < 0.01 | < 0.01      | 0.02 | 0.0656      |
| <u>NOD-like receptor signaling pathway</u>                        | < 0.01 | < 0.01      | 0.02 | 0.0656      |
| <u>Phosphatidylinositol signaling system</u>                      | < 0.01 | < 0.01      | 0.02 | 0.0656      |
| <u>Retrograde endocannabinoid signaling</u>                       | < 0.01 | < 0.01      | 0.02 | 0.0656      |
| <u>Adherens junction</u>                                          | < 0.01 | < 0.01      | 0.03 | 0.083389831 |
| <u>African trypanosomiasis</u>                                    | < 0.01 | < 0.01      | 0.03 | 0.083389831 |
| <u>Alcoholism</u>                                                 | < 0.01 | < 0.01      | 0.03 | 0.083389831 |
| <u>Glycolysis / Gluconeogenesis</u>                               | < 0.01 | < 0.01      | 0.03 | 0.083389831 |
| <u>Glycosphingolipid biosynthesis - ganglio series</u>            | 0.01   | 0.013898305 | 0.03 | 0.083389831 |
| <u>Intestinal immune network for IgA production</u>               | < 0.01 | < 0.01      | 0.03 | 0.083389831 |
| <u>Mineral absorption</u>                                         | 0.05   | 0.061654135 | 0.03 | 0.083389831 |
| <u>Pentose phosphate pathway</u>                                  | < 0.01 | < 0.01      | 0.03 | 0.083389831 |
| <u>beta-Alanine metabolism</u>                                    | 0.01   | 0.013898305 | 0.04 | 0.096470588 |
| <u>Complement and coagulation cascades</u>                        | < 0.01 | < 0.01      | 0.04 | 0.096470588 |
| <u>Fc epsilon RI signaling pathway</u>                            | < 0.01 | < 0.01      | 0.04 | 0.096470588 |
| <u>GnRH signaling pathway</u>                                     | < 0.01 | < 0.01      | 0.04 | 0.096470588 |
| <u>Legionellosis</u>                                              | 0.03   | 0.038740157 | 0.04 | 0.096470588 |
| <u>Pathogenic Escherichia coli infection</u>                      | < 0.01 | < 0.01      | 0.04 | 0.096470588 |
| <u>RIG-I-like receptor signaling pathway</u>                      | < 0.01 | < 0.01      | 0.04 | 0.096470588 |
| <u>Salmonella infection</u>                                       | < 0.01 | < 0.01      | 0.04 | 0.096470588 |
| <u>Serotonergic synapse</u>                                       | < 0.01 | < 0.01      | 0.04 | 0.096470588 |

## B.

|                                                                   | p-value Mean | q-value Mean | p-value variance | q-value variance |
|-------------------------------------------------------------------|--------------|--------------|------------------|------------------|
| <u>Adipocytokine signaling pathway</u>                            | < 0.01       | < 0.01       | < 0.01           | < 0.01           |
| <u>Alcoholism</u>                                                 | < 0.01       | < 0.01       | < 0.01           | < 0.01           |
| <u>Amphetamine addiction</u>                                      | < 0.01       | < 0.01       | < 0.01           | < 0.01           |
| <u>Chagas disease (American trypanosomiasis)</u>                  | < 0.01       | < 0.01       | < 0.01           | < 0.01           |
| <u>Chemical carcinogenesis</u>                                    | < 0.01       | < 0.01       | < 0.01           | < 0.01           |
| <u>Cocaine addiction</u>                                          | < 0.01       | < 0.01       | < 0.01           | < 0.01           |
| <u>Drug metabolism - cytochrome P450</u>                          | < 0.01       | < 0.01       | < 0.01           | < 0.01           |
| <u>Epithelial cell signaling in Helicobacter pylori infection</u> | < 0.01       | < 0.01       | < 0.01           | < 0.01           |
| <u>Fat digestion and absorption</u>                               | < 0.01       | < 0.01       | < 0.01           | < 0.01           |
| <u>Fatty acid biosynthesis</u>                                    | < 0.01       | < 0.01       | < 0.01           | < 0.01           |
| <u>GABAergic synapse</u>                                          | < 0.01       | < 0.01       | < 0.01           | < 0.01           |
| <u>Glutamatergic synapse</u>                                      | < 0.01       | < 0.01       | < 0.01           | < 0.01           |
| <u>Glycine, serine and threonine metabolism</u>                   | < 0.01       | < 0.01       | < 0.01           | < 0.01           |
| <u>Hippo signaling pathway</u>                                    | < 0.01       | < 0.01       | < 0.01           | < 0.01           |
| <u>Lysine degradation</u>                                         | < 0.01       | < 0.01       | < 0.01           | < 0.01           |
| <u>Metabolism of xenobiotics by cytochrome P450</u>               | < 0.01       | < 0.01       | < 0.01           | < 0.01           |
| <u>Mineral absorption</u>                                         | < 0.01       | < 0.01       | < 0.01           | < 0.01           |



|                                                                  |        |             |        |             |
|------------------------------------------------------------------|--------|-------------|--------|-------------|
| <u>Morphine addiction</u>                                        | < 0.01 | < 0.01      | < 0.01 | < 0.01      |
| <u>Mucin type O-Glycan biosynthesis</u>                          | < 0.01 | < 0.01      | < 0.01 | < 0.01      |
| <u>Phenylalanine metabolism</u>                                  | < 0.01 | < 0.01      | < 0.01 | < 0.01      |
| <u>Phototransduction</u>                                         | < 0.01 | < 0.01      | < 0.01 | < 0.01      |
| <u>Progesterone-mediated oocyte maturation</u>                   | < 0.01 | < 0.01      | < 0.01 | < 0.01      |
| <u>Regulation of actin cytoskeleton</u>                          | < 0.01 | < 0.01      | < 0.01 | < 0.01      |
| <u>Retinol metabolism</u>                                        | < 0.01 | < 0.01      | < 0.01 | < 0.01      |
| <u>Vasopressin-regulated water reabsorption</u>                  | < 0.01 | < 0.01      | < 0.01 | < 0.01      |
| <u>Alzheimer's disease</u>                                       | < 0.01 | < 0.01      | 0.01   | 0.04775     |
| <u>Arrhythmogenic right ventricular cardiomyopathy (ARVC)</u>    | < 0.01 | < 0.01      | 0.01   | 0.04775     |
| <u>Basal cell carcinoma</u>                                      | < 0.01 | < 0.01      | 0.01   | 0.04775     |
| <u>Cell adhesion molecules (CAMs)</u>                            | < 0.01 | < 0.01      | 0.01   | 0.04775     |
| <u>Circadian entrainment</u>                                     | < 0.01 | < 0.01      | 0.01   | 0.04775     |
| <u>Citrate cycle (TCA cycle)</u>                                 | < 0.01 | < 0.01      | 0.01   | 0.04775     |
| <u>Hedgehog signaling pathway</u>                                | < 0.01 | < 0.01      | 0.01   | 0.04775     |
| <u>Influenza A</u>                                               | < 0.01 | < 0.01      | 0.01   | 0.04775     |
| <u>Leishmaniasis</u>                                             | < 0.01 | < 0.01      | 0.01   | 0.04775     |
| <u>Pathogenic Escherichia coli infection</u>                     | < 0.01 | < 0.01      | 0.01   | 0.04775     |
| <u>Sphingolipid metabolism</u>                                   | < 0.01 | < 0.01      | 0.01   | 0.04775     |
| <u>Steroid biosynthesis</u>                                      | < 0.01 | < 0.01      | 0.01   | 0.04775     |
| <u>Steroid hormone biosynthesis</u>                              | < 0.01 | < 0.01      | 0.01   | 0.04775     |
| <u>Type II diabetes mellitus</u>                                 | < 0.01 | < 0.01      | 0.01   | 0.04775     |
| <u>Viral myocarditis</u>                                         | < 0.01 | < 0.01      | 0.01   | 0.04775     |
| <u>Carbohydrate digestion and absorption</u>                     | < 0.01 | < 0.01      | 0.02   | 0.081276596 |
| <u>Endocrine and other factor-regulated calcium reabsorption</u> | < 0.01 | < 0.01      | 0.02   | 0.081276596 |
| <u>Glutathione metabolism</u>                                    | < 0.01 | < 0.01      | 0.02   | 0.081276596 |
| <u>Leukocyte transendothelial migration</u>                      | < 0.01 | < 0.01      | 0.02   | 0.081276596 |
| <u>Notch signaling pathway</u>                                   | < 0.01 | < 0.01      | 0.02   | 0.081276596 |
| <u>Olfactory transduction</u>                                    | < 0.01 | < 0.01      | 0.02   | 0.081276596 |
| <u>Phenylalanine, tyrosine and tryptophan biosynthesis</u>       | 0.03   | 0.033705882 | 0.02   | 0.081276596 |

**Supplementary Table 3A.** Globaltest analysis of miRNA expression level and overall survival in MyI153 dataset. Metrics of correlation using Cox proportional hazards model and 100,000 permutations are reported for each miRNAs.

|                 | p-value | q-value    | Statistic  | Expected   | Std.dev    |
|-----------------|---------|------------|------------|------------|------------|
| hsa-let-7c-5p   | 0.0057  | 0.36536667 | 47.5713015 | 4.55041897 | 9.89415368 |
| hsa-miR-20a-5p  | 0.00665 | 0.36536667 | 35.6077866 | 4.53727014 | 7.36636418 |
| hsa-miR-520c-3p | 0.0097  | 0.36536667 | 25.0404323 | 4.52760084 | 5.37053781 |
| hsa-miR-106a-5p | 0.01958 | 0.40647714 | 27.7883663 | 4.54954639 | 7.50977835 |
| hsa-miR-17-5p   | 0.02038 | 0.40647714 | 25.7373892 | 4.5544273  | 6.9308241  |
| hsa-miR-18a-5p  | 0.0222  | 0.40647714 | 28.4685007 | 4.57399511 | 8.02625205 |
| hsa-miR-92a-3p  | 0.02518 | 0.40647714 | 31.9947969 | 4.5630765  | 9.70657386 |
| hsa-miR-30a-3p  | 0.03291 | 0.46485375 | 12.315713  | 4.55355513 | 3.35505459 |
| hsa-miR-224-5p  | 0.05496 | 0.58462091 | 16.8563321 | 4.58848924 | 6.22628125 |
| hsa-miR-7-5p    | 0.07249 | 0.58462091 | 16.7291997 | 4.54913331 | 7.32903097 |
| hsa-miR-335-5p  | 0.07545 | 0.58462091 | 15.060276  | 4.54444398 | 6.53926899 |
| hsa-miR-193a-5p | 0.08636 | 0.58462091 | 14.6696811 | 4.56632283 | 6.83419406 |
| hsa-miR-503-5p  | 0.08726 | 0.58462091 | 16.7038982 | 4.54531353 | 8.3331544  |
| hsa-let-7b-5p   | 0.08848 | 0.58462091 | 15.533172  | 4.5549237  | 7.57381728 |
| hsa-let-7a-5p   | 0.0957  | 0.58462091 | 14.3538075 | 4.5855635  | 7.35536672 |
| hsa-miR-26a-5p  | 0.0977  | 0.58462091 | 18.5922267 | 4.51879514 | 10.5175172 |
| hsa-miR-18a-3p  | 0.10168 | 0.58462091 | 15.3836299 | 4.56213229 | 8.38729353 |
| hsa-miR-98-5p   | 0.10384 | 0.58462091 | 12.2792582 | 4.53788305 | 6.12446572 |
| hsa-miR-99a-5p  | 0.10879 | 0.58462091 | 15.2816927 | 4.5997991  | 8.83198124 |
| hsa-miR-132-3p  | 0.1107  | 0.58462091 | 13.449635  | 4.51539837 | 7.60391871 |
| hsa-miR-181a-5p | 0.11196 | 0.58462091 | 25.9884944 | 4.57281343 | 17.5113876 |
| hsa-miR-28-5p   | 0.11382 | 0.58462091 | 13.8535935 | 4.58508678 | 7.94854278 |
| hsa-miR-133b    | 0.13519 | 0.61945731 | 9.75732631 | 4.54971189 | 5.39288392 |
| hsa-miR-106b-5p | 0.1358  | 0.61945731 | 9.91891297 | 4.57565985 | 5.58271074 |
| hsa-miR-124-3p  | 0.13874 | 0.61945731 | 10.1601068 | 4.56655554 | 5.91776277 |
| hsa-miR-21-5p   | 0.14253 | 0.61945731 | 8.53399046 | 4.5682351  | 4.14650781 |
| hsa-miR-181c-5p | 0.15093 | 0.63167    | 10.8940981 | 4.57050253 | 7.56421674 |
| hsa-miR-19b-3p  | 0.16331 | 0.6590725  | 9.11081228 | 4.53493779 | 6.13709047 |
| hsa-miR-449a    | 0.18553 | 0.71920733 | 9.68380171 | 4.54938163 | 7.49272831 |
| hsa-miR-34b-3p  | 0.19094 | 0.71920733 | 7.26628992 | 4.53036577 | 4.75507712 |
| hsa-miR-15a-5p  | 0.21436 | 0.74588921 | 8.16444999 | 4.54961508 | 7.58121517 |
| hsa-miR-181d-5p | 0.22222 | 0.74588921 | 7.14976765 | 4.55400926 | 5.62741978 |
| hsa-miR-542-5p  | 0.23061 | 0.74588921 | 6.88016156 | 4.53571382 | 6.36252929 |
| hsa-miR-30c-5p  | 0.23069 | 0.74588921 | 6.99531553 | 4.53683174 | 6.49218606 |
| hsa-miR-24-3p   | 0.24374 | 0.74588921 | 6.80347309 | 4.50746439 | 7.38031364 |
| hsa-miR-216b-5p | 0.24704 | 0.74588921 | 7.3595293  | 4.5706686  | 8.25003189 |
| hsa-miR-138-5p  | 0.24944 | 0.74588921 | 6.28516354 | 4.5263898  | 5.73407317 |
| hsa-let-7e-5p   | 0.25083 | 0.74588921 | 6.70091323 | 4.53289869 | 7.69677718 |
| hsa-miR-195-5p  | 0.26134 | 0.74616791 | 6.47207885 | 4.56824271 | 7.97870146 |
| hsa-miR-221-3p  | 0.27101 | 0.74616791 | 7.14485583 | 4.53582445 | 10.9660231 |
| hsa-miR-205-5p  | 0.27937 | 0.74616791 | 5.78104418 | 4.54496163 | 6.59418216 |
| hsa-miR-222-3p  | 0.28272 | 0.74616791 | 8.02852243 | 4.5060229  | 13.7653347 |
| hsa-miR-93-5p   | 0.28394 | 0.74616791 | 5.6103906  | 4.5654188  | 6.69733256 |
| hsa-let-7g-5p   | 0.31655 | 0.78866938 | 5.50059586 | 4.57614383 | 10.8360553 |
| hsa-miR-302c-3p | 0.32002 | 0.78866938 | 4.80241935 | 4.52856256 | 3.82517183 |
| hsa-miR-125a-5p | 0.32819 | 0.78866938 | 4.67214692 | 4.52536653 | 6.6148648  |
| hsa-miR-30a-5p  | 0.33076 | 0.78866938 | 4.60568049 | 4.58039184 | 4.86264441 |
| hsa-miR-19a-3p  | 0.33501 | 0.78866938 | 4.46234519 | 4.54116184 | 6.06274998 |
| hsa-miR-519d-3p | 0.38407 | 0.86770706 | 3.83078688 | 4.5252202  | 5.22321069 |
| hsa-miR-107     | 0.39052 | 0.86770706 | 3.29622505 | 4.56169471 | 8.2041177  |
| hsa-miR-569     | 0.39162 | 0.86770706 | 3.13005377 | 4.55134598 | 9.7260149  |
| hsa-miR-155-5p  | 0.4046  | 0.87922692 | 3.18648078 | 4.53082808 | 6.94800126 |
| hsa-miR-29b-3p  | 0.43136 | 0.88254915 | 2.63951934 | 4.5427497  | 8.02456624 |
| hsa-miR-126-3p  | 0.4389  | 0.88254915 | 2.61734454 | 4.5588561  | 7.22423248 |
| hsa-miR-99b-5p  | 0.44447 | 0.88254915 | 1.80106781 | 4.5059117  | 10.3731123 |
| hsa-miR-363-3p  | 0.44856 | 0.88254915 | 3.07905901 | 4.52269354 | 5.12908493 |
| hsa-miR-378a-5p | 0.4516  | 0.88254915 | 2.70377024 | 4.55964133 | 6.38222064 |
| hsa-miR-101-3p  | 0.45432 | 0.88254915 | 2.83362546 | 4.55693456 | 5.94036778 |
| hsa-miR-128-3p  | 0.4608  | 0.88254915 | 2.81078988 | 4.5448772  | 5.61616379 |
| hsa-miR-1       | 0.47593 | 0.89633483 | 1.87723504 | 4.51791477 | 8.2981564  |
| hsa-miR-29c-3p  | 0.50402 | 0.90167543 | 1.97981053 | 4.54874931 | 6.74913511 |
| hsa-miR-199a-3p | 0.50689 | 0.90167543 | 2.65577849 | 4.55676509 | 5.02103164 |
| hsa-miR-622     | 0.52465 | 0.90167543 | 1.27051189 | 4.54808017 | 8.14374493 |

|                 |         |            |            |             |            |
|-----------------|---------|------------|------------|-------------|------------|
| hsa-miR-30d-5p  | 0.53119 | 0.90167543 | 2.15579962 | 4.54977683  | 5.88671822 |
| hsa-miR-494-3p  | 0.53299 | 0.90167543 | 1.55982247 | 4.56050135  | 8.54723886 |
| hsa-miR-193b-3p | 0.55208 | 0.90167543 | 2.09767633 | 4.561033    | 5.78392166 |
| hsa-miR-433-3p  | 0.55295 | 0.90167543 | 2.06195137 | 4.53982133  | 5.42046537 |
| hsa-miR-204-5p  | 0.55475 | 0.90167543 | 1.11895831 | 4.5252165   | 7.61601748 |
| hsa-miR-22-3p   | 0.55645 | 0.90167543 | 2.03044564 | 4.512762    | 5.7478866  |
| hsa-miR-296-5p  | 0.55856 | 0.90167543 | 2.14266569 | 4.52641991  | 5.3723928  |
| hsa-miR-203a    | 0.57235 | 0.91092324 | 2.42219462 | 4.54845768  | 5.10030014 |
| hsa-miR-182-5p  | 0.61466 | 0.94771878 | 1.63424214 | 4.54956799  | 5.6275083  |
| hsa-miR-16-1-3p | 0.62013 | 0.94771878 | 1.13784728 | 4.52800126  | 6.52440522 |
| hsa-miR-34a-5p  | 0.62063 | 0.94771878 | 1.12441028 | 4.54149855  | 6.75302837 |
| hsa-miR-122-5p  | 0.64004 | 0.95945692 | 1.12065478 | 4.49802521  | 6.16714015 |
| hsa-miR-26b-5p  | 0.64697 | 0.95945692 | 1.83264731 | 4.52597017  | 4.85959794 |
| hsa-miR-193a-3p | 0.66206 | 0.95945692 | 0.96707281 | 4.56564222  | 6.53770908 |
| hsa-miR-31-5p   | 0.66228 | 0.95945692 | 0.89131175 | 4.53681643  | 6.52455805 |
| hsa-miR-519a-3p | 0.67284 | 0.96241671 | 2.04716067 | 4.54282118  | 4.46980181 |
| hsa-miR-100-5p  | 0.69658 | 0.97505049 | 1.34765512 | 4.59191078  | 5.28043067 |
| hsa-miR-520b    | 0.69893 | 0.97505049 | 0.01794487 | 4.5460946   | 7.59406338 |
| hsa-miR-34c-5p  | 0.72116 | 0.97708989 | 0.22301336 | 4.51736006  | 6.90885672 |
| hsa-miR-125b-5p | 0.72286 | 0.97708989 | 0.72816218 | 4.58018513  | 6.1245045  |
| hsa-miR-146a-5p | 0.73257 | 0.97708989 | 0.16001909 | 4.53017585  | 6.96374562 |
| hsa-miR-29a-3p  | 0.73674 | 0.97708989 | 0.26302708 | 4.55997736  | 6.82293704 |
| hsa-miR-302a-3p | 0.76289 | 0.97708989 | 0.03802766 | 4.5005218   | 6.85084447 |
| hsa-miR-10b-5p  | 0.76562 | 0.97708989 | 1.44264193 | 4.54229557  | 4.67664078 |
| hsa-miR-133a-3p | 0.77378 | 0.97708989 | 0.20381296 | 4.52402938  | 6.33796046 |
| hsa-miR-194-5p  | 0.77847 | 0.97708989 | 0.70299681 | 4.53544359  | 5.68148196 |
| hsa-miR-522-3p  | 0.7856  | 0.97708989 | 0.88271009 | 4.58144701  | 5.50032559 |
| hsa-miR-200c-3p | 0.78686 | 0.97708989 | 0.28771942 | 4.55497352  | 6.33018293 |
| hsa-miR-217     | 0.79846 | 0.97856785 | 0.43062391 | 4.52887583  | 5.89663567 |
| hsa-miR-424-5p  | 0.80537 | 0.97856785 | 0.00402515 | 4.55133382  | 6.58952342 |
| hsa-miR-301a-3p | 0.83523 | 0.99411    | 0.03500053 | 4.52206539  | 5.93599465 |
| hsa-miR-137     | 0.86955 | 0.99411    | 0.72999714 | 4.55599461  | 4.91571099 |
| hsa-miR-373-3p  | 0.88934 | 0.99411    | 0.75875046 | 4.52146796  | 4.94203618 |
| hsa-miR-214-3p  | 0.89913 | 0.99411    | 0.5012432  | 4.54458789  | 4.88575869 |
| hsa-miR-223-3p  | 0.90984 | 0.99411    | 0.17253701 | 4.53709948  | 5.51576337 |
| hsa-miR-16-5p   | 0.91134 | 0.99411    | 0.56541137 | 4.55648704  | 5.08623632 |
| hsa-miR-143-3p  | 0.91674 | 0.99411    | 0.35015833 | 4.544417963 | 5.22528641 |
| hsa-miR-365a-3p | 0.92277 | 0.99411    | 0.00097258 | 4.51151469  | 5.62246047 |
| hsa-miR-302b-3p | 0.93165 | 0.99411    | 0.03080135 | 4.5523542   | 5.43425849 |
| hsa-miR-145-5p  | 0.94743 | 0.99411    | 9.23E-05   | 4.53969241  | 5.06315817 |
| hsa-miR-146b-5p | 0.95173 | 0.99411    | 0.41085933 | 4.55894843  | 4.86781672 |
| hsa-miR-34b-5p  | 0.95391 | 0.99411    | 0.12660025 | 4.53013378  | 4.60696766 |
| hsa-miR-96-5p   | 0.95707 | 0.99411    | 0.55567166 | 4.5283834   | 4.75181627 |
| hsa-miR-483-3p  | 0.97125 | 0.99411    | 0.06226096 | 4.53063412  | 4.38749387 |
| hsa-miR-199b-3p | 0.97347 | 0.99411    | 0.24056527 | 4.55609891  | 4.92461685 |
| hsa-miR-30b-5p  | 0.97508 | 0.99411    | 0.00095375 | 4.53886615  | 5.11628673 |
| hsa-miR-483-5p  | 0.97571 | 0.99411    | 0.00843942 | 4.53382722  | 4.80322909 |
| hsa-miR-372-3p  | 0.99057 | 0.99411    | 0.33907682 | 4.54543314  | 4.30437195 |
| hsa-miR-378a-3p | 0.99217 | 0.99411    | 0.20864554 | 4.53584425  | 4.27127633 |
| hsa-miR-451a    | 0.99411 | 0.99411    | 0.0003744  | 4.54415951  | 4.34821564 |

**Supplementary Table 3B.** Globaltest analysis of miRNA expression level and progression-free survival in MyI153 dataset. Metrics of correlation using Cox proportional hazards model and 100,000 permutations are reported for each miRNAs.

|                 | p-value | q-value    | Statistic  | Expected   | Std.dev    |
|-----------------|---------|------------|------------|------------|------------|
| hsa-miR-520c-3p | 0.00694 | 0.78422    | 30.8045102 | 4.51368816 | 6.36590262 |
| hsa-miR-15a-5p  | 0.02886 | 0.98505182 | 25.7388974 | 4.49772608 | 8.0247851  |
| hsa-miR-181c-5p | 0.03825 | 0.98505182 | 24.3849675 | 4.52445799 | 8.41635213 |
| hsa-miR-98-5p   | 0.0389  | 0.98505182 | 16.6540926 | 4.53330794 | 5.17059203 |
| hsa-miR-137     | 0.05636 | 0.98505182 | 13.3499887 | 4.51787726 | 4.59799521 |
| hsa-miR-133b    | 0.0564  | 0.98505182 | 15.3491974 | 4.52257407 | 5.59612575 |
| hsa-miR-18a-3p  | 0.07115 | 0.98505182 | 23.9183393 | 4.50571363 | 11.9202467 |
| hsa-miR-205-5p  | 0.08866 | 0.98505182 | 17.0025174 | 4.50426919 | 8.86989056 |
| hsa-miR-101-3p  | 0.10302 | 0.98505182 | 12.7058017 | 4.51439552 | 6.36819697 |
| hsa-miR-193a-5p | 0.1031  | 0.98505182 | 12.3077184 | 4.50937907 | 6.13770017 |
| hsa-miR-24-3p   | 0.11365 | 0.98505182 | 13.0923126 | 4.5139961  | 7.29452098 |
| hsa-miR-181a-5p | 0.1179  | 0.98505182 | 23.8698653 | 4.40624535 | 19.5374492 |
| hsa-miR-132-3p  | 0.1385  | 0.98505182 | 12.1493961 | 4.54630319 | 7.89728881 |
| hsa-miR-224-5p  | 0.14558 | 0.98505182 | 10.2945438 | 4.49357096 | 6.42472759 |
| hsa-miR-21-5p   | 0.15742 | 0.98505182 | 8.58144692 | 4.49706378 | 5.66754867 |
| hsa-miR-28-5p   | 0.15758 | 0.98505182 | 11.2259914 | 4.52464976 | 8.44612677 |
| hsa-miR-7-5p    | 0.15811 | 0.98505182 | 11.7070671 | 4.50713123 | 8.90995778 |
| hsa-miR-16-5p   | 0.17601 | 0.98505182 | 8.31303881 | 4.50464691 | 5.60468666 |
| hsa-miR-92a-3p  | 0.18408 | 0.98505182 | 9.34783111 | 4.48151291 | 7.97082183 |
| hsa-miR-193b-3p | 0.18545 | 0.98505182 | 8.81869153 | 4.50702346 | 7.23025225 |
| hsa-miR-26a-5p  | 0.19287 | 0.98505182 | 9.4826688  | 4.50018905 | 8.67786102 |
| hsa-miR-519d-3p | 0.19562 | 0.98505182 | 7.56744001 | 4.52266331 | 5.47004671 |
| hsa-let-7e-5p   | 0.20831 | 0.98505182 | 8.48908383 | 4.51166754 | 7.82976127 |
| hsa-miR-372-3p  | 0.2104  | 0.98505182 | 6.79571811 | 4.49857898 | 4.69853952 |
| hsa-miR-34a-5p  | 0.23714 | 0.98505182 | 6.60715452 | 4.51615958 | 6.00883201 |
| hsa-miR-365a-3p | 0.25319 | 0.98505182 | 6.3439022  | 4.50659184 | 5.97060025 |
| hsa-miR-30a-3p  | 0.26651 | 0.98505182 | 5.27462758 | 4.53522683 | 3.57020641 |
| hsa-miR-30c-5p  | 0.26767 | 0.98505182 | 6.18715894 | 4.52790403 | 7.70463745 |
| hsa-miR-449a    | 0.29846 | 0.98505182 | 5.64256056 | 4.48086726 | 7.72106827 |
| hsa-miR-30a-5p  | 0.31634 | 0.98505182 | 4.82777977 | 4.50524126 | 5.24496524 |
| hsa-miR-200c-3p | 0.34573 | 0.98505182 | 4.26980647 | 4.5027342  | 5.69733725 |
| hsa-miR-133a-3p | 0.35382 | 0.98505182 | 4.27903854 | 4.51199273 | 5.06191558 |
| hsa-miR-222-3p  | 0.36271 | 0.98505182 | 3.67951847 | 4.51824471 | 16.2307295 |
| hsa-let-7g-5p   | 0.37    | 0.98505182 | 3.49452226 | 4.47374033 | 11.0734926 |
| hsa-let-7c-5p   | 0.37386 | 0.98505182 | 3.84266669 | 4.48377641 | 6.95041545 |
| hsa-miR-302c-3p | 0.37905 | 0.98505182 | 4.0772112  | 4.51927249 | 3.85239706 |
| hsa-miR-195-5p  | 0.38072 | 0.98505182 | 3.63560685 | 4.489536   | 7.18263566 |
| hsa-miR-363-3p  | 0.38467 | 0.98505182 | 4.02311555 | 4.54762788 | 4.69125766 |
| hsa-miR-221-3p  | 0.39196 | 0.98505182 | 2.85757274 | 4.50764597 | 12.1911146 |
| hsa-miR-99a-5p  | 0.39793 | 0.98505182 | 3.3775303  | 4.47283079 | 7.29379009 |
| hsa-miR-145-5p  | 0.40891 | 0.98505182 | 3.4243923  | 4.49580046 | 5.81348158 |
| hsa-miR-34c-5p  | 0.4141  | 0.98505182 | 3.36698897 | 4.54690109 | 6.32638513 |
| hsa-miR-181d-5p | 0.41431 | 0.98505182 | 3.54486409 | 4.53380472 | 5.51454428 |
| hsa-miR-20a-5p  | 0.41968 | 0.98505182 | 3.23483087 | 4.49298228 | 5.90691991 |
| hsa-miR-22-3p   | 0.43482 | 0.98505182 | 3.19722166 | 4.5398016  | 5.74691583 |
| hsa-miR-503-5p  | 0.45402 | 0.98505182 | 2.56086371 | 4.48875388 | 6.89341641 |
| hsa-miR-216b-5p | 0.45601 | 0.98505182 | 2.66345823 | 4.52076712 | 7.0463527  |
| hsa-let-7b-5p   | 0.45912 | 0.98505182 | 2.5748008  | 4.50137391 | 6.75922459 |
| hsa-miR-155-5p  | 0.46007 | 0.98505182 | 2.06614701 | 4.47848565 | 8.17281854 |
| hsa-miR-1       | 0.4652  | 0.98505182 | 2.18263419 | 4.52521414 | 8.11280445 |
| hsa-miR-16-1-3p | 0.48069 | 0.98505182 | 2.65121844 | 4.50299922 | 5.76217578 |
| hsa-miR-138-5p  | 0.48301 | 0.98505182 | 2.65190909 | 4.51283505 | 5.60766317 |
| hsa-miR-125b-5p | 0.48691 | 0.98505182 | 2.57643432 | 4.49505509 | 5.65629667 |
| hsa-miR-569     | 0.48732 | 0.98505182 | 1.17942718 | 4.50820728 | 10.2387061 |
| hsa-miR-122-5p  | 0.49183 | 0.98505182 | 2.72702854 | 4.53050119 | 5.11391314 |
| hsa-miR-542-5p  | 0.5067  | 0.98505182 | 2.60284159 | 4.51472505 | 5.03555466 |

|                 |         |            |            |            |            |
|-----------------|---------|------------|------------|------------|------------|
| hsa-miR-126-3p  | 0.52899 | 0.98505182 | 1.21734698 | 4.51133374 | 7.81910245 |
| hsa-miR-296-5p  | 0.53626 | 0.98505182 | 1.40790613 | 4.52063698 | 8.0931866  |
| hsa-miR-10b-5p  | 0.54084 | 0.98505182 | 2.39647562 | 4.51384718 | 5.69564599 |
| hsa-miR-146a-5p | 0.56594 | 0.98505182 | 0.07540695 | 4.4805105  | 9.43367635 |
| hsa-miR-106a-5p | 0.5679  | 0.98505182 | 1.6888129  | 4.49225405 | 6.27649344 |
| hsa-miR-107     | 0.57151 | 0.98505182 | 1.10836889 | 4.5234359  | 7.27372027 |
| hsa-miR-18a-5p  | 0.5789  | 0.98505182 | 1.11462583 | 4.49550866 | 7.32479024 |
| hsa-miR-99b-5p  | 0.59453 | 0.98505182 | 0.0047387  | 4.52525219 | 9.6499216  |
| hsa-miR-520b    | 0.59644 | 0.98505182 | 0.09713506 | 4.53824165 | 9.41342548 |
| hsa-miR-17-5p   | 0.60112 | 0.98505182 | 1.63500839 | 4.49180458 | 5.97244241 |
| hsa-miR-29b-3p  | 0.60815 | 0.98505182 | 0.02176796 | 4.50963972 | 9.41295206 |
| hsa-miR-217     | 0.61106 | 0.98505182 | 1.6956487  | 4.50578184 | 6.4974647  |
| hsa-miR-302a-3p | 0.62402 | 0.98505182 | 0.34488935 | 4.50235452 | 7.86795753 |
| hsa-miR-204-5p  | 0.63769 | 0.98505182 | 0.26731073 | 4.51292654 | 8.1258885  |
| hsa-miR-34b-5p  | 0.64117 | 0.98505182 | 1.27176028 | 4.49927621 | 6.46188044 |
| hsa-miR-203a    | 0.64667 | 0.98505182 | 0.31012059 | 4.47292915 | 8.99378287 |
| hsa-let-7a-5p   | 0.65555 | 0.98505182 | 1.15537852 | 4.52741001 | 5.99609011 |
| hsa-miR-522-3p  | 0.66454 | 0.98505182 | 0.07169003 | 4.51650712 | 8.89792546 |
| hsa-miR-194-5p  | 0.68125 | 0.98505182 | 1.47214081 | 4.51120364 | 4.99175674 |
| hsa-miR-494-3p  | 0.68399 | 0.98505182 | 0.44580026 | 4.46493785 | 8.06335499 |
| hsa-miR-106b-5p | 0.69651 | 0.98505182 | 0.83543575 | 4.50140683 | 6.27353306 |
| hsa-miR-622     | 0.71879 | 0.98505182 | 0.55477036 | 4.49118    | 6.65496329 |
| hsa-miR-26b-5p  | 0.72059 | 0.98505182 | 1.75163091 | 4.52595236 | 4.60510112 |
| hsa-miR-424-5p  | 0.72381 | 0.98505182 | 0.00011211 | 4.47255023 | 7.33065884 |
| hsa-miR-93-5p   | 0.72762 | 0.98505182 | 0.00548456 | 4.50962782 | 7.14699454 |
| hsa-miR-214-3p  | 0.76607 | 0.98505182 | 0.9178704  | 4.50300178 | 5.74656238 |
| hsa-miR-335-5p  | 0.76641 | 0.98505182 | 0.6332284  | 4.51231715 | 6.01895117 |
| hsa-miR-31-5p   | 0.76859 | 0.98505182 | 0.00553574 | 4.49535386 | 6.96193014 |
| hsa-miR-125a-5p | 0.77768 | 0.98505182 | 0.43447145 | 4.52204745 | 6.31059781 |
| hsa-miR-29a-3p  | 0.7852  | 0.98505182 | 0.05298802 | 4.50133875 | 6.79256432 |
| hsa-miR-301a-3p | 0.79899 | 0.98505182 | 0.52370331 | 4.52175318 | 5.94260878 |
| hsa-miR-199a-3p | 0.80707 | 0.98505182 | 0.73326793 | 4.53302965 | 5.4851674  |
| hsa-miR-124-3p  | 0.82747 | 0.98505182 | 1.4508853  | 4.51688965 | 4.29382373 |
| hsa-miR-373-3p  | 0.82836 | 0.98505182 | 0.42022057 | 4.50355979 | 5.66173593 |
| hsa-miR-29c-3p  | 0.83266 | 0.98505182 | 0.10253288 | 4.49939308 | 6.10552245 |
| hsa-miR-302b-3p | 0.84016 | 0.98505182 | 0.00253399 | 4.48899151 | 6.20959488 |
| hsa-miR-433-3p  | 0.84493 | 0.98505182 | 0.88112286 | 4.51561069 | 4.91215872 |
| hsa-miR-30d-5p  | 0.84562 | 0.98505182 | 0.04598701 | 4.49586403 | 6.11331744 |
| hsa-miR-193a-3p | 0.8486  | 0.98505182 | 0.1215158  | 4.50599737 | 6.00358832 |
| hsa-miR-34b-3p  | 0.86855 | 0.98505182 | 0.21025861 | 4.51257068 | 5.66147786 |
| hsa-miR-223-3p  | 0.87205 | 0.98505182 | 0.4150613  | 4.49857954 | 5.33357041 |
| hsa-miR-483-5p  | 0.88279 | 0.98505182 | 1.60E-06   | 4.50691371 | 5.79214501 |
| hsa-miR-96-5p   | 0.88521 | 0.98505182 | 0.75892399 | 4.50968798 | 4.80325616 |
| hsa-miR-378a-5p | 0.88574 | 0.98505182 | 0.0266626  | 4.50181012 | 5.68374493 |
| hsa-miR-199b-3p | 0.88952 | 0.98505182 | 0.05558671 | 4.54375284 | 5.71967312 |
| hsa-miR-19b-3p  | 0.90345 | 0.98505182 | 0.0049691  | 4.51766568 | 5.62401998 |
| hsa-miR-100-5p  | 0.90955 | 0.98505182 | 0.20607788 | 4.49459777 | 5.38429649 |
| hsa-miR-19a-3p  | 0.91967 | 0.98505182 | 0.05367477 | 4.51703044 | 5.46543203 |
| hsa-miR-128-3p  | 0.92713 | 0.98505182 | 0.0809657  | 4.53266378 | 5.32931191 |
| hsa-miR-30b-5p  | 0.93956 | 0.98505182 | 0.71601019 | 4.51867667 | 4.39664405 |
| hsa-miR-483-3p  | 0.94264 | 0.98505182 | 0.3090737  | 4.50196369 | 4.57962017 |
| hsa-miR-143-3p  | 0.94325 | 0.98505182 | 0.23873255 | 4.52987003 | 4.85593598 |
| hsa-miR-519a-3p | 0.95388 | 0.98505182 | 0.28406977 | 4.53133289 | 4.49141695 |
| hsa-miR-146b-5p | 0.9589  | 0.98505182 | 0.31489614 | 4.52871511 | 4.62201882 |
| hsa-miR-378a-3p | 0.97834 | 0.99149    | 0.79982776 | 4.52956256 | 3.66374618 |
| hsa-miR-182-5p  | 0.98984 | 0.99149    | 0.22980887 | 4.5312861  | 4.05026966 |
| hsa-miR-451a    | 0.99149 | 0.99149    | 0.15695454 | 4.50764582 | 3.84715184 |
